# Supplementary material for: MicroRNA profiling of mouse liver in response to DENV-1 infection by deep sequencing
Source: PeerJ. 2019 Apr 22;7:e6697. doi: 10.7717/peerj.6697 (PMC6482938; doi:10.7717/peerj.6697)
Supplement: Data S1 [file peerj-07-6697-s001.xlsx]

## Sheet: raw expression
DENV1-DENVC raw expression data
miRBase database: mature.fa, number of allowed mismatches: 0
Mismatch filtering: keep best matches only
Grouping options used: ignore mismatches
Sample filenames
0	DENVC_AR_filter.fa (Uninfected control)
1	DENV1_AR_filter.fa
Organism Code	miRNA Code	Sequence	Genome Matches	Sample: DENVC_AR_filter.fa raw expression	Sample: DENV1_AR_filter.fa raw expression
Organism: mmu
	let-7a-1-3p
		CTATACAATCTACTGTCTTT	1	0	2
		CTATACAATCTACTGTCTTTC	2	0	0
		CTATACAATCTACTGTCTTTCC	2	4	1
		Totals:	3	4	3
	let-7a-5p
		AGGTAGTAGGTTGTATAGTT	1	1	0
		GAGGTAGTAGGTTGTATAGTT	1	0	0
		GTAGTAGGTTGTATAGTT	1	1	0
		TGAGGTAGTAGGTTGTAT	1	224	58
		TGAGGTAGTAGGTTGTATA	1	28	1
		TGAGGTAGTAGGTTGTATAG	1	137	20
		TGAGGTAGTAGGTTGTATAGT	1	439	227
		TGAGGTAGTAGGTTGTATAGTT	1	4435	989
		Totals:	7	5265	1295
	let-7b-3p
		CTATACAACCTACTGCCTTCC	1	1	0
		Totals:	1	1	0
	let-7b-5p
		AGGTAGTAGGTTGTGTGGT	1	0	0
		TGAGGTAGTAGGTTGTGT	1	12	3
		TGAGGTAGTAGGTTGTGTG	1	20	2
		TGAGGTAGTAGGTTGTGTGG	1	84	8
		TGAGGTAGTAGGTTGTGTGGT	1	120	17
		TGAGGTAGTAGGTTGTGTGGTT	1	734	159
		Totals:	6	970	189
	let-7c-2-3p
		CTATACAATCTACTGTCTTT	1	0	2
		CTATACAATCTACTGTCTTTC	2	0	0
		CTATACAATCTACTGTCTTTCC	2	4	1
		Totals:	3	4	3
	let-7c-5p
		AGGTAGTAGGTTGTATGGTT	1	2	0
		GAGGTAGTAGGTTGTATGGTT	1	5	0
		GGTAGTAGGTTGTATGGTT	1	1	0
		TGAGGTAGTAGGTTGTAT	1	224	58
		TGAGGTAGTAGGTTGTATG	1	27	2
		TGAGGTAGTAGGTTGTATGG	1	77	8
		TGAGGTAGTAGGTTGTATGGT	1	294	91
		TGAGGTAGTAGGTTGTATGGTT	1	6443	1667
		Totals:	6	7073	1826
	let-7d-3p
		CTATACGACCTGCTGCCTTT	1	0	0
		CTATACGACCTGCTGCCTTTC	1	1	0
		CTATACGACCTGCTGCCTTTCT	1	6	0
		Totals:	3	7	0
	let-7d-5p
		AGAGGTAGTAGGTTGCAT	1	23	7
		AGAGGTAGTAGGTTGCATA	1	3	1
		AGAGGTAGTAGGTTGCATAG	1	28	6
		AGAGGTAGTAGGTTGCATAGT	1	145	32
		AGAGGTAGTAGGTTGCATAGTT	1	728	128
		GAGGTAGTAGGTTGCATAGTT	1	0	0
		GGTAGTAGGTTGCATAGT	1	1	0
		GGTAGTAGGTTGCATAGTT	1	1	0
		Totals:	6	929	174
	let-7e-3p
		CTATACGGCCTCCTAGCTTT	1	0	1
		CTATACGGCCTCCTAGCTTTC	1	1	0
		CTATACGGCCTCCTAGCTTTCC	1	1	1
		Totals:	1	2	2
	let-7e-5p
		TGAGGTAGGAGGTTGTAT	1	3	0
		TGAGGTAGGAGGTTGTATA	1	0	1
		TGAGGTAGGAGGTTGTATAG	1	6	2
		TGAGGTAGGAGGTTGTATAGT	1	7	6
		TGAGGTAGGAGGTTGTATAGTT	1	92	10
		Totals:	4	108	19
	let-7f-1-3p
		CTATACAATCTATTGCCTTCCC	1	1	0
		Totals:	1	1	0
	let-7f-2-3p
		CTATACAGTCTACTGTCTTTC	1	1	0
		Totals:	1	1	0
	let-7f-5p
		AGGTAGTAGATTGTATAG	1	0	1
		AGGTAGTAGATTGTATAGTT	1	2	0
		GAGGTAGTAGATTGTATAG	1	0	0
		GAGGTAGTAGATTGTATAGT	1	3	0
		GAGGTAGTAGATTGTATAGTT	1	4	3
		GGTAGTAGATTGTATAGT	1	0	1
		GGTAGTAGATTGTATAGTT	1	1	0
		GTAGTAGATTGTATAGTT	1	5	2
		TGAGGTAGTAGATTGTAT	1	876	212
		TGAGGTAGTAGATTGTATA	1	91	13
		TGAGGTAGTAGATTGTATAG	1	563	76
		TGAGGTAGTAGATTGTATAGT	1	2856	1057
		TGAGGTAGTAGATTGTATAGTT	1	28729	4914
		Totals:	9	33130	6279
	let-7g-5p
		AGGTAGTAGTTTGTACAGTT	1	0	2
		GAGGTAGTAGTTTGTACAGT	1	0	1
		GAGGTAGTAGTTTGTACAGTT	1	1	0
		GGTAGTAGTTTGTACAGTT	1	1	0
		TGAGGTAGTAGTTTGTAC	1	735	120
		TGAGGTAGTAGTTTGTACA	1	184	27
		TGAGGTAGTAGTTTGTACAG	1	263	54
		TGAGGTAGTAGTTTGTACAGT	1	900	601
		TGAGGTAGTAGTTTGTACAGTT	1	18130	3351
		Totals:	6	20214	4156
	let-7i-3p
		CTGCGCAAGCTACTGCCTTGC	1	1	0
		Totals:	1	1	0
	let-7i-5p
		GAGGTAGTAGTTTGTGCTGTT	1	0	0
		TGAGGTAGTAGTTTGTGC	1	5	0
		TGAGGTAGTAGTTTGTGCT	1	10	3
		TGAGGTAGTAGTTTGTGCTG	1	184	30
		TGAGGTAGTAGTTTGTGCTGT	1	643	140
		TGAGGTAGTAGTTTGTGCTGTT	1	3727	863
		Totals:	5	4569	1036
	mir-100-5p
		AACCCGTAGATCCGAACT	1	3	0
		AACCCGTAGATCCGAACTT	1	4	1
		AACCCGTAGATCCGAACTTG	1	115	15
		AACCCGTAGATCCGAACTTGT	1	695	153
		AACCCGTAGATCCGAACTTGTG	1	1155	196
		ACCCGTAGATCCGAACTTGT	1	1	1
		ACCCGTAGATCCGAACTTGTG	1	7	0
		Totals:	6	1980	366
	mir-101a-3p
		ACAGTACTGTGATAACTGAA	1	3	0
		AGTACTGTGATAACTGAA	1	1	0
		CAGTACTGTGATAACTGAA	1	2	0
		TACAGTACTGTGATAACT	1	20	2
		TACAGTACTGTGATAACTG	1	185	14
		TACAGTACTGTGATAACTGA	1	1618	213
		TACAGTACTGTGATAACTGAA	1	4419	501
		Totals:	4	6248	730
	mir-101b-3p
		ACAGTACTGTGATAGCTG	1	3	1
		ACAGTACTGTGATAGCTGA	1	27	8
		ACAGTACTGTGATAGCTGAA	1	24	3
		AGTACTGTGATAGCTGAA	1	2	1
		CAGTACTGTGATAGCTGA	1	3	1
		CAGTACTGTGATAGCTGAA	1	5	0
		TACAGTACTGTGATAGCT	1	40	10
		TACAGTACTGTGATAGCTG	1	427	70
		TACAGTACTGTGATAGCTGA	1	3275	475
		TACAGTACTGTGATAGCTGAA	1	2762	388
		Totals:	7	6568	957
	mir-103-3p
		AGCAGCATTGTACAGGGCT	1	3	0
		AGCAGCATTGTACAGGGCTA	1	2	1
		AGCAGCATTGTACAGGGCTAT	2	25	5
		AGCAGCATTGTACAGGGCTATG	1	144	26
		AGCAGCATTGTACAGGGCTATGA	1	841	120
		AGCATTGTACAGGGCTATG	1	1	0
		CAGCATTGTACAGGGCTATG	1	1	0
		CAGCATTGTACAGGGCTATGA	1	4	2
		GCATTGTACAGGGCTATG	1	0	0
		GCATTGTACAGGGCTATGA	1	0	1
		Totals:	6	1021	155
	mir-106a-5p
		AAAGTGCTAACAGTGCAGGTAG	1	0	0
		CAAAGTGCTAACAGTGCAGGTAG	1	1	0
		Totals:	1	1	0
	mir-106b-3p
		CCGCACTGTGGGTACTTG	1	1	1
		CCGCACTGTGGGTACTTGC	1	1	0
		CCGCACTGTGGGTACTTGCT	1	18	3
		CCGCACTGTGGGTACTTGCTG	1	23	6
		CCGCACTGTGGGTACTTGCTGC	1	1	0
		Totals:	2	44	10
	mir-106b-5p
		TAAAGTGCTGACAGTGCAG	1	0	0
		TAAAGTGCTGACAGTGCAGA	1	17	3
		TAAAGTGCTGACAGTGCAGAT	1	14	2
		Totals:	3	31	5
	mir-107-3p
		AGCAGCATTGTACAGGGCT	1	3	0
		AGCAGCATTGTACAGGGCTA	1	2	1
		AGCAGCATTGTACAGGGCTAT	2	25	5
		AGCAGCATTGTACAGGGCTATC	1	57	6
		AGCAGCATTGTACAGGGCTATCA	1	55	9
		GCAGCATTGTACAGGGCTATCA	1	0	0
		Totals:	6	142	21
	mir-10a-3p
		AATTCGTATCTAGGGGAAT	1	0	0
		CAAATTCGTATCTAGGGG	1	1	0
		CAAATTCGTATCTAGGGGA	1	0	1
		CAAATTCGTATCTAGGGGAA	1	0	1
		CAAATTCGTATCTAGGGGAAT	1	6	2
		CAAATTCGTATCTAGGGGAATA	1	0	0
		Totals:	3	7	4
	mir-10a-5p
		ACCCTGTAGATCCGAATT	1	5	0
		ACCCTGTAGATCCGAATTT	1	11	1
		ACCCTGTAGATCCGAATTTG	1	137	20
		ACCCTGTAGATCCGAATTTGT	1	971	308
		ACCCTGTAGATCCGAATTTGTG	1	2801	439
		CCCTGTAGATCCGAATTTG	1	1	0
		CCCTGTAGATCCGAATTTGT	1	4	0
		CCCTGTAGATCCGAATTTGTG	1	20	6
		CCTGTAGATCCGAATTTGT	1	1	0
		CCTGTAGATCCGAATTTGTG	1	1	0
		CTGTAGATCCGAATTTGT	1	2	1
		CTGTAGATCCGAATTTGTG	1	1	0
		TACCCTGTAGATCCGAAT	1	4	0
		TACCCTGTAGATCCGAATT	1	31	5
		TACCCTGTAGATCCGAATTT	1	58	26
		TACCCTGTAGATCCGAATTTG	1	557	87
		TACCCTGTAGATCCGAATTTGT	1	5535	1403
		TACCCTGTAGATCCGAATTTGTG	1	3252	461
		TGTAGATCCGAATTTGTG	1	0	1
		Totals:	13	13392	2758
	mir-10b-5p
		ACCCTGTAGAACCGAATTT	1	1	0
		ACCCTGTAGAACCGAATTTG	1	1	0
		ACCCTGTAGAACCGAATTTGT	1	15	2
		ACCCTGTAGAACCGAATTTGTG	1	29	2
		TACCCTGTAGAACCGAATT	1	1	1
		TACCCTGTAGAACCGAATTTG	1	29	3
		TACCCTGTAGAACCGAATTTGT	1	147	35
		TACCCTGTAGAACCGAATTTGTG	1	129	10
		Totals:	4	352	53
	mir-1191
		CAGTCTTACTATGTAGCCCTA	1	2	1
		Totals:	1	2	1
	mir-1198-3p
		AAGCTAGCCTCTAACTCATGGC	1	0	0
		Totals:	1	0	0
	mir-1198-5p
		TATGTGTTCCTGGCTGGCTTG	1	4	0
		TATGTGTTCCTGGCTGGCTTGG	1	11	4
		Totals:	2	15	4
	mir-122-3p
		AAACGCCATTATCACACT	1	3	3
		AAACGCCATTATCACACTA	1	0	2
		AAACGCCATTATCACACTAA	1	12	1
		AACGCCATTATCACACTA	1	3	1
		AACGCCATTATCACACTAA	1	2	1
		Totals:	3	20	8
	mir-122-5p
		AGTGTGACAATGGTGTTTG	1	4	1
		GAGTGTGACAATGGTGTTT	1	1	0
		GAGTGTGACAATGGTGTTTG	1	2	0
		GGAGTGTGACAATGGTGTTT	1	1	0
		GGAGTGTGACAATGGTGTTTG	1	2	1
		GTGTGACAATGGTGTTTG	1	13	1
		TGGAGTGTGACAATGGTG	1	962	194
		TGGAGTGTGACAATGGTGT	1	2793	694
		TGGAGTGTGACAATGGTGTT	1	5671	1705
		TGGAGTGTGACAATGGTGTTT	1	57139	18583
		TGGAGTGTGACAATGGTGTTTG	1	74251	20215
		Totals:	7	140839	41394
	mir-1247-3p
		CGGGAACGTCGAGACTGGAG	1	0	0
		CGGGAACGTCGAGACTGGAGC	1	1	0
		Totals:	2	1	0
	mir-1249-3p
		ACGCCCTTCCCCCCCTTCTTCA	1	1	1
		Totals:	1	1	1
	mir-1258-5p
		TGCTGAGCTAATTCCCTAACTG	1	1	0
		Totals:	1	1	0
	mir-125a-5p
		CCCTGAGACCCTTTAACCTGTG	1	1	0
		TCCCTGAGACCCTTTAAC	1	1	0
		TCCCTGAGACCCTTTAACC	1	0	0
		TCCCTGAGACCCTTTAACCT	1	1	2
		TCCCTGAGACCCTTTAACCTG	1	15	4
		TCCCTGAGACCCTTTAACCTGT	1	111	32
		TCCCTGAGACCCTTTAACCTGTG	1	59	13
		TCCCTGAGACCCTTTAACCTGTGA	1	15	3
		TGAGACCCTTTAACCTGT	1	0	0
		TGAGACCCTTTAACCTGTGA	1	0	1
		Totals:	6	203	55
	mir-125b-1-3p
		ACGGGTTAGGCTCTTGGGAG	1	0	0
		ACGGGTTAGGCTCTTGGGAGC	1	1	0
		ACGGGTTAGGCTCTTGGGAGCT	1	2	1
		Totals:	2	3	1
	mir-125b-2-3p
		ACAAGTCAGGTTCTTGGGAC	1	8	2
		ACAAGTCAGGTTCTTGGGACC	1	2	0
		ACAAGTCAGGTTCTTGGGACCT	1	2	0
		Totals:	3	12	2
	mir-125b-5p
		CCCTGAGACCCTAACTTGTGA	1	11	3
		CTGAGACCCTAACTTGTGA	1	1	0
		TCCCTGAGACCCTAACTT	1	1	0
		TCCCTGAGACCCTAACTTG	1	9	2
		TCCCTGAGACCCTAACTTGT	1	49	13
		TCCCTGAGACCCTAACTTGTG	1	168	18
		TCCCTGAGACCCTAACTTGTGA	1	147	19
		TGAGACCCTAACTTGTGA	1	1	0
		Totals:	7	387	55
	mir-126a-3p
		CGTACCGTGAGTAATAAT	2	1	1
		CGTACCGTGAGTAATAATG	1	78	13
		CGTACCGTGAGTAATAATGC	1	246	43
		CGTACCGTGAGTAATAATGCG	1	491	55
		GTACCGTGAGTAATAATGCG	1	1	0
		TACCGTGAGTAATAATGCG	1	0	0
		TCGTACCGTGAGTAATAA	1	0	0
		TCGTACCGTGAGTAATAAT	2	25	4
		TCGTACCGTGAGTAATAATG	1	1225	203
		TCGTACCGTGAGTAATAATGC	1	1721	282
		TCGTACCGTGAGTAATAATGCG	1	6660	1039
		Totals:	10	10448	1640
	mir-126a-5p
		ATTATTACTTTTGGTACGCG	2	1	0
		CATTATTACTTTTGGTACG	1	7	4
		CATTATTACTTTTGGTACGC	2	80	5
		CATTATTACTTTTGGTACGCG	2	444	51
		TTATTACTTTTGGTACGCG	2	1	0
		Totals:	5	533	60
	mir-127-3p
		TCGGATCCGTCTGAGCTTG	1	1	0
		TCGGATCCGTCTGAGCTTGG	1	13	1
		TCGGATCCGTCTGAGCTTGGC	1	5	1
		TCGGATCCGTCTGAGCTTGGCT	1	22	5
		Totals:	2	41	7
	mir-127-5p
		CTGAAGCTCAGAGGGCTCTGAT	1	0	0
		Totals:	1	0	0
	mir-128-3p
		TCACAGTGAACCGGTCTC	1	0	0
		TCACAGTGAACCGGTCTCTT	1	2	0
		TCACAGTGAACCGGTCTCTTT	1	16	3
		Totals:	3	18	3
	mir-129-5p
		CTTTTTGCGGTCTGGGCTTGC	1	0	0
		Totals:	1	0	0
	mir-1291
		ATGGCTCTTACTGAAGACT	1	1	0
		ATGGCTCTTACTGAAGACTAGCA	1	1	0
		Totals:	2	2	0
	mir-1306-3p
		ACGTTGGCTCTGGTGGTGATG	1	1	0
		Totals:	1	1	0
	mir-130a-3p
		CAGTGCAATGTTAAAAGGG	1	0	0
		CAGTGCAATGTTAAAAGGGC	1	6	4
		CAGTGCAATGTTAAAAGGGCA	1	14	4
		CAGTGCAATGTTAAAAGGGCAT	1	6	1
		GCAATGTTAAAAGGGCAT	1	1	0
		Totals:	4	27	9
	mir-130a-5p
		GCTCTTTTCACATTGTGCTACT	1	0	1
		Totals:	1	0	1
	mir-130b-5p
		ACTCTTTCCCTGTTGCACTACT	1	0	0
		Totals:	1	0	0
	mir-132-3p
		TAACAGTCTACAGCCATGGTCG	1	2	0
		Totals:	1	2	0
	mir-132-5p
		AACCGTGGCTTTCGATTGTT	1	1	0
		AACCGTGGCTTTCGATTGTTA	1	2	0
		ACCGTGGCTTTCGATTGT	1	0	0
		ACCGTGGCTTTCGATTGTT	1	1	0
		ACCGTGGCTTTCGATTGTTA	1	0	0
		ACCGTGGCTTTCGATTGTTAC	1	0	0
		Totals:	6	4	0
	mir-133a-3p
		TTGGTCCCCTTCAACCAGC	2	1	0
		TTGGTCCCCTTCAACCAGCTG	1	14	0
		TTTGGTCCCCTTCAACCAGC	1	2	0
		TTTGGTCCCCTTCAACCAGCT	2	2	0
		TTTGGTCCCCTTCAACCAGCTG	1	23	0
		Totals:	7	42	0
	mir-133b-3p
		TTGGTCCCCTTCAACCAGC	2	1	0
		TTTGGTCCCCTTCAACCAGC	1	2	0
		TTTGGTCCCCTTCAACCAGCT	2	2	0
		TTTGGTCCCCTTCAACCAGCTA	1	2	0
		Totals:	6	7	0
	mir-134-3p
		CTGTGGGCCACCTAGTCAC	1	1	0
		Totals:	1	1	0
	mir-134-5p
		TGTGACTGGTTGACCAGAGGG	1	3	0
		TGTGACTGGTTGACCAGAGGGG	1	2	0
		Totals:	1	5	0
	mir-135a-5p
		TATGGCTTTTTATTCCTATGTGA	1	1	0
		Totals:	1	1	0
	mir-136-3p
		ATCATCGTCTCAAATGAGTCT	1	2	0
		Totals:	1	2	0
	mir-136-5p
		ACTCCATTTGTTTTGATGAT	1	0	0
		ACTCCATTTGTTTTGATGATGG	1	5	0
		Totals:	1	5	0
	mir-137-3p
		TTATTGCTTAAGAATACGCGTA	1	2	0
		TTATTGCTTAAGAATACGCGTAG	1	1	0
		Totals:	1	3	0
	mir-137-5p
		ACGGGTATTCTTGGGTGGATA	1	1	0
		ACGGGTATTCTTGGGTGGATAA	1	1	0
		Totals:	2	2	0
	mir-139-5p
		TCTACAGTGCACGTGTCT	1	4	0
		TCTACAGTGCACGTGTCTCC	1	12	1
		TCTACAGTGCACGTGTCTCCA	1	12	0
		TCTACAGTGCACGTGTCTCCAG	1	51	6
		Totals:	4	79	7
	mir-140-3p
		ACCACAGGGTAGAACCAC	1	3	0
		ACCACAGGGTAGAACCACG	1	20	0
		ACCACAGGGTAGAACCACGG	1	108	19
		CACAGGGTAGAACCACGG	1	1	0
		CCACAGGGTAGAACCACG	1	1	0
		TACCACAGGGTAGAACCAC	1	4	1
		TACCACAGGGTAGAACCACG	1	19	1
		TACCACAGGGTAGAACCACGG	1	235	43
		Totals:	6	391	64
	mir-140-5p
		CAGTGGTTTTACCCTATGGT	1	3	0
		CAGTGGTTTTACCCTATGGTA	1	9	2
		CAGTGGTTTTACCCTATGGTAG	1	20	3
		Totals:	2	32	5
	mir-141-3p
		TAACACTGTCTGGTAAAGAT	1	2	0
		TAACACTGTCTGGTAAAGATG	1	1	0
		Totals:	1	3	0
	mir-141-5p
		CATCTTCCAGTGCAGTGTTGGA	1	1	0
		Totals:	1	1	0
	mir-142-3p
		GTAGTGTTTCCTACTTTATG	1	2	0
		GTAGTGTTTCCTACTTTATGG	1	3	1
		GTAGTGTTTCCTACTTTATGGA	1	10	0
		TAGTGTTTCCTACTTTAT	1	0	0
		TAGTGTTTCCTACTTTATGG	1	0	0
		TAGTGTTTCCTACTTTATGGA	1	1	0
		TGTAGTGTTTCCTACTTTATGG	1	24	4
		TGTAGTGTTTCCTACTTTATGGA	1	8	3
		Totals:	7	48	8
	mir-142-5p
		ATAAAGTAGAAAGCACTA	1	0	0
		ATAAAGTAGAAAGCACTACT	1	2	0
		CATAAAGTAGAAAGCACT	1	4	0
		CATAAAGTAGAAAGCACTA	1	0	0
		CATAAAGTAGAAAGCACTAC	1	0	0
		CATAAAGTAGAAAGCACTACT	1	7	1
		Totals:	5	13	1
	mir-143-3p
		AGATGAAGCACTGTAGCT	1	0	0
		AGATGAAGCACTGTAGCTC	1	1	1
		GAGATGAAGCACTGTAGCTC	1	0	0
		GATGAAGCACTGTAGCTC	1	1	0
		TGAGATGAAGCACTGTAG	1	58	9
		TGAGATGAAGCACTGTAGC	1	96	20
		TGAGATGAAGCACTGTAGCT	1	1165	457
		TGAGATGAAGCACTGTAGCTC	1	15465	2539
		Totals:	8	16786	3026
	mir-143-5p
		GGTGCAGTGCTGCATCTCTGG	1	22	2
		Totals:	1	22	2
	mir-144-3p
		TACAGTATAGATGATGTA	1	1	0
		TACAGTATAGATGATGTAC	1	10	3
		TACAGTATAGATGATGTACT	1	51	15
		Totals:	2	62	18
	mir-144-5p
		GATATCATCATATACTGTAAG	1	0	0
		GATATCATCATATACTGTAAGT	1	1	0
		GGATATCATCATATACTGTA	1	9	2
		GGATATCATCATATACTGTAA	1	0	0
		GGATATCATCATATACTGTAAG	1	68	6
		GGATATCATCATATACTGTAAGT	1	12	2
		Totals:	5	90	10
	mir-145a-3p
		ATTCCTGGAAATACTGTT	1	0	0
		ATTCCTGGAAATACTGTTC	1	16	4
		ATTCCTGGAAATACTGTTCT	1	31	5
		ATTCCTGGAAATACTGTTCTT	1	49	9
		Totals:	4	96	18
	mir-145a-5p
		CCAGTTTTCCCAGGAATCCCT	1	0	0
		GTCCAGTTTTCCCAGGAA	1	0	0
		GTCCAGTTTTCCCAGGAAT	1	24	7
		GTCCAGTTTTCCCAGGAATC	1	11	1
		GTCCAGTTTTCCCAGGAATCC	1	80	6
		GTCCAGTTTTCCCAGGAATCCC	1	154	20
		GTCCAGTTTTCCCAGGAATCCCT	1	977	155
		GTTTTCCCAGGAATCCCT	1	1	0
		TCCAGTTTTCCCAGGAATCCC	1	1	0
		TCCAGTTTTCCCAGGAATCCCT	1	2	0
		Totals:	7	1250	189
	mir-145b
		GTCCAGTTTTCCCAGGAGA	1	0	0
		Totals:	1	0	0
	mir-146a-5p
		TGAGAACTGAATTCCATGGGT	1	1	0
		TGAGAACTGAATTCCATGGGTT	1	13	4
		Totals:	1	14	4
	mir-146b-5p
		TGAGAACTGAATTCCATA	1	1	0
		TGAGAACTGAATTCCATAGG	1	1	0
		TGAGAACTGAATTCCATAGGC	1	2	0
		TGAGAACTGAATTCCATAGGCT	1	19	3
		Totals:	2	23	3
	mir-147-3p
		GTGTGCGGAAATGCTTCTGCTA	1	0	1
		Totals:	1	0	1
	mir-148a-3p
		AGTGCACTACAGAACTTT	1	1	0
		AGTGCACTACAGAACTTTGT	1	37	16
		CAGTGCACTACAGAACTT	1	0	0
		CAGTGCACTACAGAACTTTGT	1	59	22
		GTGCACTACAGAACTTTG	1	2	0
		GTGCACTACAGAACTTTGT	1	47	18
		TCAGTGCACTACAGAACT	1	48	11
		TCAGTGCACTACAGAACTT	1	49	12
		TCAGTGCACTACAGAACTTT	1	239	52
		TCAGTGCACTACAGAACTTTG	1	1636	278
		TCAGTGCACTACAGAACTTTGT	1	182237	47872
		TGCACTACAGAACTTTGT	1	16	4
		Totals:	10	184371	48285
	mir-148a-5p
		AAAGTTCTGAGACACTCC	1	1	1
		AAAGTTCTGAGACACTCCG	1	1	0
		AAAGTTCTGAGACACTCCGA	1	10	3
		AAAGTTCTGAGACACTCCGAC	1	11	1
		AAAGTTCTGAGACACTCCGACT	1	196	70
		AAGTTCTGAGACACTCCGACT	1	1	0
		Totals:	4	220	75
	mir-148b-3p
		AGTGCATCACAGAACTTTGT	1	1	0
		CAGTGCATCACAGAACTTTGT	1	1	0
		TCAGTGCATCACAGAACTTT	1	0	0
		TCAGTGCATCACAGAACTTTG	1	18	4
		TCAGTGCATCACAGAACTTTGT	1	209	57
		Totals:	3	229	61
	mir-148b-5p
		GAAGTTCTGTTATACACTC	1	1	0
		GAAGTTCTGTTATACACTCA	1	1	0
		GAAGTTCTGTTATACACTCAG	1	1	0
		GAAGTTCTGTTATACACTCAGG	1	3	2
		GAAGTTCTGTTATACACTCAGGC	1	7	0
		GAAGTTCTGTTATACACTCAGGCT	1	0	0
		Totals:	4	13	2
	mir-149-5p
		TCTGGCTCCGTGTCTTCACT	1	1	0
		TCTGGCTCCGTGTCTTCACTC	1	0	0
		TCTGGCTCCGTGTCTTCACTCC	1	2	1
		TCTGGCTCCGTGTCTTCACTCCC	1	0	1
		Totals:	3	3	2
	mir-150-5p
		CTCCCAACCCTTGTACCAGTG	1	1	0
		TCTCCCAACCCTTGTACC	1	1	0
		TCTCCCAACCCTTGTACCAG	1	2	0
		TCTCCCAACCCTTGTACCAGT	1	6	3
		TCTCCCAACCCTTGTACCAGTG	1	84	7
		Totals:	4	94	10
	mir-151-3p
		CTAGACTGAGGCTCCTTG	1	4	0
		CTAGACTGAGGCTCCTTGA	1	3	0
		CTAGACTGAGGCTCCTTGAG	1	2	2
		CTAGACTGAGGCTCCTTGAGG	1	58	25
		Totals:	3	67	27
	mir-151-5p
		TCGAGGAGCTCACAGTCT	1	1	0
		TCGAGGAGCTCACAGTCTAG	1	0	0
		TCGAGGAGCTCACAGTCTAGT	1	31	6
		Totals:	2	32	6
	mir-152-3p
		GTGCATGACAGAACTTGG	1	0	0
		TCAGTGCATGACAGAACT	1	0	2
		TCAGTGCATGACAGAACTT	1	19	2
		TCAGTGCATGACAGAACTTG	1	8	5
		TCAGTGCATGACAGAACTTGG	1	247	32
		Totals:	5	274	41
	mir-152-5p
		AGGTTCTGTGATACACTCCGAC	1	1	0
		AGGTTCTGTGATACACTCCGACT	1	3	0
		TAGGTTCTGTGATACACTCCGACT	1	3	0
		Totals:	2	7	0
	mir-154-5p
		TAGGTTATCCGTGTTGCCTTCG	1	1	0
		Totals:	1	1	0
	mir-155-5p
		TTAATGCTAATTGTGATAGGG	1	1	1
		TTAATGCTAATTGTGATAGGGG	1	0	0
		TTAATGCTAATTGTGATAGGGGT	1	3	3
		Totals:	2	4	4
	mir-15a-3p
		CAGGCCATACTGTGCTGCCTCA	1	1	0
		Totals:	1	1	0
	mir-15a-5p
		TAGCAGCACATAATGGTTT	1	1	0
		TAGCAGCACATAATGGTTTG	1	1	0
		TAGCAGCACATAATGGTTTGT	1	5	0
		TAGCAGCACATAATGGTTTGTG	1	3	0
		Totals:	4	10	0
	mir-15b-3p
		CGAATCATTATTTGCTGCT	1	3	0
		CGAATCATTATTTGCTGCTCT	1	3	0
		CGAATCATTATTTGCTGCTCTA	1	5	0
		Totals:	1	11	0
	mir-15b-5p
		TAGCAGCACATCATGGTTT	1	5	2
		TAGCAGCACATCATGGTTTA	1	6	2
		TAGCAGCACATCATGGTTTAC	1	7	0
		TAGCAGCACATCATGGTTTACA	1	7	3
		Totals:	4	25	7
	mir-16-1-3p
		CCAGTATTGACTGTGCTGCT	1	0	0
		CCAGTATTGACTGTGCTGCTG	1	0	0
		CCAGTATTGACTGTGCTGCTGA	1	15	1
		Totals:	3	15	1
	mir-16-5p
		AGCAGCACGTAAATATTGGCG	1	1	0
		TAGCAGCACGTAAATATT	1	2	0
		TAGCAGCACGTAAATATTG	1	1	0
		TAGCAGCACGTAAATATTGG	1	38	1
		TAGCAGCACGTAAATATTGGC	1	90	12
		TAGCAGCACGTAAATATTGGCG	1	137	9
		Totals:	5	269	22
	mir-17-3p
		ACTGCAGTGAGGGCACTTGTA	1	2	1
		ACTGCAGTGAGGGCACTTGTAG	1	1	1
		Totals:	1	3	2
	mir-17-5p
		CAAAGTGCTTACAGTGCAGGT	1	8	1
		CAAAGTGCTTACAGTGCAGGTA	1	10	1
		CAAAGTGCTTACAGTGCAGGTAG	1	54	5
		Totals:	3	72	7
	mir-181a-1-3p
		ACCATCGACCGTTGATTGT	1	0	0
		ACCATCGACCGTTGATTGTAC	1	6	0
		ACCATCGACCGTTGATTGTACC	1	8	0
		Totals:	2	14	0
	mir-181a-5p
		AACATTCAACGCTGTCGGT	1	5	3
		AACATTCAACGCTGTCGGTG	1	29	2
		AACATTCAACGCTGTCGGTGA	1	55	9
		AACATTCAACGCTGTCGGTGAG	1	29	4
		AACATTCAACGCTGTCGGTGAGT	1	52	9
		TTCAACGCTGTCGGTGAGT	1	0	1
		Totals:	5	170	28
	mir-181b-5p
		AACATTCATTGCTGTCGGT	1	1	0
		AACATTCATTGCTGTCGGTG	1	2	0
		AACATTCATTGCTGTCGGTGG	1	5	0
		AACATTCATTGCTGTCGGTGGG	1	2	1
		AACATTCATTGCTGTCGGTGGGT	1	12	3
		Totals:	4	22	4
	mir-181c-3p
		ACCATCGACCGTTGAGTGGAC	1	0	0
		Totals:	1	0	0
	mir-181c-5p
		AACATTCAACCTGTCGGTGA	1	0	0
		AACATTCAACCTGTCGGTGAGT	1	1	0
		Totals:	2	1	0
	mir-181d-5p
		AACATTCATTGTTGTCGGT	1	1	0
		AACATTCATTGTTGTCGGTG	1	3	0
		AACATTCATTGTTGTCGGTGG	1	4	0
		AACATTCATTGTTGTCGGTGGG	1	2	0
		AACATTCATTGTTGTCGGTGGGT	1	4	3
		Totals:	4	14	3
	mir-182-5p
		TTTGGCAATGGTAGAACTC	1	2	0
		TTTGGCAATGGTAGAACTCA	1	12	0
		TTTGGCAATGGTAGAACTCAC	1	10	1
		TTTGGCAATGGTAGAACTCACA	1	56	2
		TTTGGCAATGGTAGAACTCACAC	1	13	1
		TTTGGCAATGGTAGAACTCACACC	1	40	4
		TTTGGCAATGGTAGAACTCACACCG	1	25	4
		Totals:	4	158	12
	mir-183-5p
		ATGGCACTGGTAGAATTCA	1	0	0
		ATGGCACTGGTAGAATTCACT	1	4	1
		TATGGCACTGGTAGAATTCA	1	2	0
		TATGGCACTGGTAGAATTCAC	1	3	0
		TATGGCACTGGTAGAATTCACT	1	46	14
		Totals:	4	55	15
	mir-1839-3p
		AGACCTACTTATCTACCAAC	1	1	0
		AGACCTACTTATCTACCAACA	1	2	0
		AGACCTACTTATCTACCAACAG	1	1	0
		AGACCTACTTATCTACCAACAGC	1	1	0
		Totals:	2	5	0
	mir-1839-5p
		AAGGTAGATAGAACAGGT	1	0	0
		AAGGTAGATAGAACAGGTC	1	0	1
		AAGGTAGATAGAACAGGTCT	1	21	4
		AAGGTAGATAGAACAGGTCTT	1	27	4
		AAGGTAGATAGAACAGGTCTTG	1	288	26
		AGGTAGATAGAACAGGTCT	1	1	0
		AGGTAGATAGAACAGGTCTT	1	2	0
		AGGTAGATAGAACAGGTCTTG	1	47	10
		Totals:	6	386	45
	mir-184-3p
		TGGACGGAGAACTGATAAGG	1	1	0
		TGGACGGAGAACTGATAAGGG	1	1	0
		TGGACGGAGAACTGATAAGGGT	1	14	0
		Totals:	3	16	0
	mir-1843a-3p
		TCTGATCGTTCACCTCCAT	1	0	0
		TCTGATCGTTCACCTCCATA	1	1	0
		TCTGATCGTTCACCTCCATAC	1	10	1
		TCTGATCGTTCACCTCCATACA	1	14	3
		Totals:	3	25	4
	mir-1843a-5p
		ATGGAGGTCTCTGTCTGAC	2	0	0
		ATGGAGGTCTCTGTCTGACT	2	20	2
		TATGGAGGTCTCTGTCTG	1	1	0
		TATGGAGGTCTCTGTCTGA	1	4	1
		TATGGAGGTCTCTGTCTGAC	1	10	1
		TATGGAGGTCTCTGTCTGACT	1	80	10
		Totals:	7	115	14
	mir-1843b-5p
		ATGGAGGTCTCTGTCTGAC	1	0	0
		ATGGAGGTCTCTGTCTGACT	2	20	2
		ATGGAGGTCTCTGTCTGACTT	1	25	5
		TGGAGGTCTCTGTCTGACTT	1	0	0
		Totals:	5	45	7
	mir-185-3p
		AGGGGCTGGCTTTCCTCTGG	1	0	0
		AGGGGCTGGCTTTCCTCTGGT	1	0	1
		Totals:	2	0	1
	mir-185-5p
		TGGAGAGAAAGGCAGTTCCT	1	3	1
		TGGAGAGAAAGGCAGTTCCTG	1	15	2
		TGGAGAGAAAGGCAGTTCCTGA	1	235	51
		Totals:	2	253	54
	mir-186-5p
		CAAAGAATTCTCCTTTTGG	1	4	1
		CAAAGAATTCTCCTTTTGGG	1	4	1
		CAAAGAATTCTCCTTTTGGGC	1	9	2
		CAAAGAATTCTCCTTTTGGGCT	1	33	5
		Totals:	4	50	9
	mir-187-3p
		TCGTGTCTTGTGTTGCAG	1	1	0
		TCGTGTCTTGTGTTGCAGC	1	0	0
		TCGTGTCTTGTGTTGCAGCC	1	0	0
		TCGTGTCTTGTGTTGCAGCCG	1	0	0
		Totals:	3	1	0
	mir-187-5p
		AGGCTACAACACAGGACCCGGG	1	0	0
		Totals:	1	0	0
	mir-188-5p
		CATCCCTTGCATGGTGGAGGG	1	1	0
		Totals:	1	1	0
	mir-18a-3p
		ACTGCCCTAAGTGCTCCTTCT	1	1	0
		ACTGCCCTAAGTGCTCCTTCTG	1	1	0
		Totals:	2	2	0
	mir-18a-5p
		TAAGGTGCATCTAGTGCAG	1	1	0
		TAAGGTGCATCTAGTGCAGA	1	0	0
		TAAGGTGCATCTAGTGCAGAT	1	1	1
		TAAGGTGCATCTAGTGCAGATA	1	2	0
		TAAGGTGCATCTAGTGCAGATAG	1	3	0
		Totals:	4	7	1
	mir-190a-5p
		TGATATGTTTGATATATTAGGT	1	0	0
		Totals:	1	0	0
	mir-191-3p
		CTGCACTTGGATTTCGTTCCC	1	2	0
		GCTGCACTTGGATTTCGTTC	1	0	0
		GCTGCACTTGGATTTCGTTCCC	1	1	0
		Totals:	2	3	0
	mir-191-5p
		AACGGAATCCCAAAAGCAG	1	0	0
		AACGGAATCCCAAAAGCAGCT	1	1	2
		AACGGAATCCCAAAAGCAGCTG	1	20	2
		CAACGGAATCCCAAAAGC	1	30	2
		CAACGGAATCCCAAAAGCA	1	8	0
		CAACGGAATCCCAAAAGCAG	1	103	7
		CAACGGAATCCCAAAAGCAGC	1	96	18
		CAACGGAATCCCAAAAGCAGCT	1	409	84
		CAACGGAATCCCAAAAGCAGCTG	1	383	60
		Totals:	8	1050	175
	mir-192-3p
		CTGCCAATTCCATAGGTCAC	1	4	0
		CTGCCAATTCCATAGGTCACA	1	7	0
		CTGCCAATTCCATAGGTCACAG	1	2	0
		Totals:	2	13	0
	mir-192-5p
		CTGACCTATGAATTGACA	1	205	40
		CTGACCTATGAATTGACAG	1	66	16
		CTGACCTATGAATTGACAGC	1	11494	2404
		CTGACCTATGAATTGACAGCC	1	13275	2323
		GACCTATGAATTGACAGC	1	0	0
		TGACCTATGAATTGACAG	1	13	2
		TGACCTATGAATTGACAGC	1	294	86
		TGACCTATGAATTGACAGCC	1	841	140
		Totals:	8	26188	5011
	mir-1932
		GTTGCGGACAGCGCTAGGTCGG	1	0	0
		Totals:	1	0	0
	mir-193a-3p
		AACTGGCCTACAAAGTCCC	1	2	0
		AACTGGCCTACAAAGTCCCA	1	1	0
		AACTGGCCTACAAAGTCCCAGT	1	3	0
		Totals:	3	6	0
	mir-193a-5p
		TGGGTCTTTGCGGGCAAGAT	1	2	3
		TGGGTCTTTGCGGGCAAGATG	1	4	0
		TGGGTCTTTGCGGGCAAGATGA	1	6	0
		Totals:	2	12	3
	mir-193b-3p
		AACTGGCCCACAAAGTCCCGC	1	1	0
		Totals:	1	1	0
	mir-194-2-3p
		CAGTGGGGCTGCTGTTATCT	1	1	0
		CCAGTGGGGCTGCTGTTATCT	1	23	6
		CCAGTGGGGCTGCTGTTATCTG	1	47	9
		Totals:	2	71	15
	mir-194-5p
		TGTAACAGCAACTCCATG	1	7	1
		TGTAACAGCAACTCCATGT	1	24	7
		TGTAACAGCAACTCCATGTG	1	42	5
		TGTAACAGCAACTCCATGTGG	1	1151	151
		TGTAACAGCAACTCCATGTGGA	1	1908	227
		Totals:	5	3132	391
	mir-1940
		ATGGAGGACTGAGAAGGTG	1	1	0
		ATGGAGGACTGAGAAGGTGGA	1	1	0
		ATGGAGGACTGAGAAGGTGGAGC	1	1	0
		ATGGAGGACTGAGAAGGTGGAGCA	1	1	0
		Totals:	4	4	0
	mir-1943-5p
		AAGGGAGGATCTGGGCACCTGGA	1	1	0
		AGGGAGGATCTGGGCACCTGGA	1	0	0
		Totals:	1	1	0
	mir-1945
		CTTCGCGGGTACTGTCGGGA	1	0	0
		TCTTCGCGGGTACTGTCGG	1	1	0
		Totals:	1	1	0
	mir-1947-5p
		AGGACGAGCTAGCTGAGTGCT	1	1	0
		Totals:	1	1	0
	mir-1948-3p
		TTTAGGCAGAGCACTCGTAC	1	4	0
		TTTAGGCAGAGCACTCGTACA	1	2	1
		TTTAGGCAGAGCACTCGTACAG	1	2	0
		Totals:	1	8	1
	mir-1948-5p
		ATATGAGTATTCTGCCTAA	1	0	1
		ATATGAGTATTCTGCCTAAA	1	1	0
		Totals:	1	1	1
	mir-1950
		TCTGCATCTAAGGATATGGTC	1	0	0
		Totals:	1	0	0
	mir-1954
		ACTGCAGAGTGAGACCCTG	1	0	0
		Totals:	1	0	0
	mir-1958
		TAGGAAAGTGGAAGCAGTAAGT	1	1	0
		Totals:	1	1	0
	mir-195a-3p
		CCAATATTGGCTGTGCTGCT	1	0	0
		CCAATATTGGCTGTGCTGCTC	1	3	2
		CCAATATTGGCTGTGCTGCTCC	1	1	1
		Totals:	3	4	3
	mir-195a-5p
		TAGCAGCACAGAAATATTGG	1	4	1
		TAGCAGCACAGAAATATTGGC	1	8	0
		Totals:	2	12	1
	mir-1960
		CCAGTGCTGTTAGAAGAGGGCT	1	0	0
		Totals:	1	0	0
	mir-1964-3p
		CCGACTTCTGGGCTCCGGCTTT	1	1	1
		Totals:	1	1	1
	mir-1968-5p
		TGCAGCTGTTAAGGATGGTGGAC	1	1	0
		TGCAGCTGTTAAGGATGGTGGACT	1	3	1
		Totals:	2	4	1
	mir-1981-3p
		ATCTAACCCTGGCCTTTGA	1	0	0
		CATCTAACCCTGGCCTTTGA	1	0	1
		Totals:	1	0	1
	mir-1981-5p
		GTAAAGGCTGGGCTTAGACG	1	2	0
		GTAAAGGCTGGGCTTAGACGT	1	8	3
		GTAAAGGCTGGGCTTAGACGTG	1	0	1
		GTAAAGGCTGGGCTTAGACGTGG	1	1	3
		GTAAAGGCTGGGCTTAGACGTGGC	1	4	3
		Totals:	4	15	10
	mir-199a-3p
		ACAGTAGTCTGCACATTG	1	3	1
		ACAGTAGTCTGCACATTGG	2	0	0
		ACAGTAGTCTGCACATTGGT	2	14	3
		ACAGTAGTCTGCACATTGGTT	2	225	45
		ACAGTAGTCTGCACATTGGTTA	2	173	26
		AGTAGTCTGCACATTGGT	2	0	0
		CAGTAGTCTGCACATTGG	2	2	0
		CAGTAGTCTGCACATTGGT	2	8	2
		CAGTAGTCTGCACATTGGTT	2	23	3
		CAGTAGTCTGCACATTGGTTA	2	16	4
		Totals:	17	464	84
	mir-199a-5p
		CAGTGTTCAGACTACCTGTT	1	0	0
		CCAGTGTTCAGACTACCTGTTC	1	0	0
		CCCAGTGTTCAGACTACCTG	1	1	0
		CCCAGTGTTCAGACTACCTGT	1	0	0
		CCCAGTGTTCAGACTACCTGTT	1	17	3
		CCCAGTGTTCAGACTACCTGTTC	1	64	10
		GTGTTCAGACTACCTGTT	1	1	0
		Totals:	7	83	13
	mir-199b-3p
		ACAGTAGTCTGCACATTG	1	3	1
		ACAGTAGTCTGCACATTGG	2	0	0
		ACAGTAGTCTGCACATTGGT	2	14	3
		ACAGTAGTCTGCACATTGGTT	2	225	45
		ACAGTAGTCTGCACATTGGTTA	2	173	26
		AGTAGTCTGCACATTGGT	2	0	0
		CAGTAGTCTGCACATTGG	2	2	0
		CAGTAGTCTGCACATTGGT	2	8	2
		CAGTAGTCTGCACATTGGTT	2	23	3
		CAGTAGTCTGCACATTGGTTA	2	16	4
		Totals:	17	464	84
	mir-199b-5p
		CCCAGTGTTTAGACTACCTGTTC	1	6	0
		Totals:	1	6	0
	mir-19a-3p
		TGTGCAAATCTATGCAAAACT	1	1	0
		TGTGCAAATCTATGCAAAACTG	1	5	0
		TGTGCAAATCTATGCAAAACTGA	1	2	0
		Totals:	2	8	0
	mir-19b-3p
		TGTGCAAATCCATGCAAAACT	1	3	0
		TGTGCAAATCCATGCAAAACTG	1	87	6
		TGTGCAAATCCATGCAAAACTGA	1	35	3
		Totals:	3	125	9
	mir-1a-3p
		GAATGTAAAGAAGTATGTAT	1	1	0
		TGGAATGTAAAGAAGTAT	1	13	0
		TGGAATGTAAAGAAGTATG	2	52	0
		TGGAATGTAAAGAAGTATGT	1	533	15
		TGGAATGTAAAGAAGTATGTA	2	348	10
		TGGAATGTAAAGAAGTATGTAT	1	4980	108
		Totals:	2	5927	133
	mir-200a-3p
		TAACACTGTCTGGTAACG	1	1	1
		TAACACTGTCTGGTAACGAT	1	6	0
		TAACACTGTCTGGTAACGATG	1	108	9
		TAACACTGTCTGGTAACGATGT	1	113	22
		Totals:	4	228	32
	mir-200a-5p
		CATCTTACCGGACAGTGCT	1	1	0
		CATCTTACCGGACAGTGCTGG	1	0	0
		CATCTTACCGGACAGTGCTGGA	1	20	2
		Totals:	3	21	2
	mir-200b-3p
		TAATACTGCCTGGTAATGAT	1	1	0
		TAATACTGCCTGGTAATGATG	1	52	5
		TAATACTGCCTGGTAATGATGA	1	53	10
		Totals:	3	106	15
	mir-200b-5p
		ATCTTACTGGGCAGCATTGGA	1	1	0
		CATCTTACTGGGCAGCATTGG	1	0	0
		Totals:	1	1	0
	mir-200c-3p
		TAATACTGCCGGGTAATGATG	1	2	0
		TAATACTGCCGGGTAATGATGG	1	9	0
		TAATACTGCCGGGTAATGATGGA	1	9	1
		Totals:	2	20	1
	mir-201-5p
		TACTCAGTAAGGCATTGTT	1	0	0
		TACTCAGTAAGGCATTGTTC	1	0	0
		Totals:	2	0	0
	mir-203-3p
		AAATGTTTAGGACCACTAG	1	1	0
		GAAATGTTTAGGACCACT	1	1	0
		GTGAAATGTTTAGGACCAC	1	1	1
		GTGAAATGTTTAGGACCACT	1	96	14
		GTGAAATGTTTAGGACCACTA	1	18	3
		GTGAAATGTTTAGGACCACTAG	1	317	35
		TGAAATGTTTAGGACCAC	1	2	1
		TGAAATGTTTAGGACCACT	1	54	15
		TGAAATGTTTAGGACCACTA	1	13	1
		TGAAATGTTTAGGACCACTAG	1	266	24
		Totals:	7	769	94
	mir-203-5p
		AGTGGTTCTTGACAGTTCAACA	1	1	0
		Totals:	1	1	0
	mir-204-5p
		TTCCCTTTGTCATCCTATGCCT	1	0	0
		Totals:	1	0	0
	mir-205-5p
		TCCTTCATTCCACCGGAGTCTG	1	8	0
		Totals:	1	8	0
	mir-206-3p
		TGGAATGTAAGGAAGTGTG	1	7	0
		TGGAATGTAAGGAAGTGTGT	1	26	0
		TGGAATGTAAGGAAGTGTGTG	1	24	0
		TGGAATGTAAGGAAGTGTGTGG	1	92	0
		Totals:	4	149	0
	mir-208a-3p
		TAAGACGAGCAAAAAGCTTGT	1	1	0
		Totals:	1	1	0
	mir-20a-3p
		ACTGCATTACGAGCACTTAAAG	1	1	0
		Totals:	1	1	0
	mir-20a-5p
		TAAAGTGCTTATAGTGCAGGT	1	16	0
		TAAAGTGCTTATAGTGCAGGTA	1	7	0
		TAAAGTGCTTATAGTGCAGGTAG	1	471	50
		Totals:	3	494	50
	mir-20b-5p
		CAAAGTGCTCATAGTGCAGGTAG	1	1	0
		Totals:	1	1	0
	mir-210-3p
		CTGTGCGTGTGACAGCGGCTGA	1	1	0
		Totals:	1	1	0
	mir-212-5p
		ACCTTGGCTCTAGACTGCTT	1	0	0
		ACCTTGGCTCTAGACTGCTTAC	1	1	0
		ACCTTGGCTCTAGACTGCTTACT	1	1	0
		Totals:	1	2	0
	mir-214-3p
		ACAGCAGGCACAGACAGGC	1	0	1
		ACAGCAGGCACAGACAGGCAG	1	3	1
		ACAGCAGGCACAGACAGGCAGT	1	3	1
		Totals:	2	6	3
	mir-214-5p
		TGCCTGTCTACACTTGCTGT	1	0	0
		TGCCTGTCTACACTTGCTGTG	1	2	0
		TGCCTGTCTACACTTGCTGTGC	1	1	0
		Totals:	2	3	0
	mir-215-5p
		ATGACCTATGATTTGACAG	1	0	0
		ATGACCTATGATTTGACAGAC	1	2	2
		Totals:	2	2	2
	mir-216a-5p
		TAATCTCAGCTGGCAACTGTGA	1	1	0
		Totals:	1	1	0
	mir-216b-5p
		AAATCTCTGCAGGCAAATGTG	1	1	0
		AAATCTCTGCAGGCAAATGTGA	1	1	0
		Totals:	2	2	0
	mir-217-5p
		TACTGCATCAGGAACTGACTG	1	3	0
		TACTGCATCAGGAACTGACTGG	1	7	0
		Totals:	2	10	0
	mir-218-5p
		TTGTGCTTGATCTAACCAT	1	1	0
		TTGTGCTTGATCTAACCATGT	1	9	1
		Totals:	1	10	1
	mir-219a-1-3p
		AGAGTTGCGTCTGGACGTC	1	1	1
		AGAGTTGCGTCTGGACGTCCCG	1	1	0
		Totals:	1	2	1
	mir-21a-3p
		AACAGCAGTCGATGGGCT	1	1	0
		CAACAGCAGTCGATGGGCTGT	1	0	0
		CAACAGCAGTCGATGGGCTGTC	1	2	0
		Totals:	1	3	0
	mir-21a-5p
		AGCTTATCAGACTGATGTTG	1	0	0
		AGCTTATCAGACTGATGTTGA	1	1	0
		CTTATCAGACTGATGTTGA	1	1	0
		GCTTATCAGACTGATGTTG	1	0	0
		GCTTATCAGACTGATGTTGA	1	1	0
		TAGCTTATCAGACTGATG	1	47	19
		TAGCTTATCAGACTGATGT	1	264	67
		TAGCTTATCAGACTGATGTT	1	134	26
		TAGCTTATCAGACTGATGTTG	1	5630	847
		TAGCTTATCAGACTGATGTTGA	1	8698	1509
		TTATCAGACTGATGTTGA	1	14	0
		Totals:	9	14790	2468
	mir-22-3p
		AAGCTGCCAGTTGAAGAA	1	1	0
		AAGCTGCCAGTTGAAGAAC	1	185	48
		AAGCTGCCAGTTGAAGAACT	1	174	50
		AAGCTGCCAGTTGAAGAACTG	1	60	4
		AAGCTGCCAGTTGAAGAACTGT	1	14211	2634
		AGCTGCCAGTTGAAGAACTGT	1	10	8
		CTGCCAGTTGAAGAACTGT	1	1	0
		GCTGCCAGTTGAAGAACTGT	1	0	0
		TGCCAGTTGAAGAACTGT	1	0	0
		Totals:	8	14642	2744
	mir-22-5p
		AGTTCTTCAGTGGCAAGCTT	1	1	0
		AGTTCTTCAGTGGCAAGCTTT	1	65	12
		AGTTCTTCAGTGGCAAGCTTTA	1	27	2
		Totals:	3	93	14
	mir-221-3p
		AGCTACATTGTCTGCTGGG	1	1	0
		AGCTACATTGTCTGCTGGGT	1	0	0
		AGCTACATTGTCTGCTGGGTT	1	3	0
		AGCTACATTGTCTGCTGGGTTT	1	21	5
		AGCTACATTGTCTGCTGGGTTTC	1	20	6
		Totals:	4	45	11
	mir-221-5p
		ACCTGGCATACAATGTAGAT	1	1	0
		ACCTGGCATACAATGTAGATT	1	2	0
		ACCTGGCATACAATGTAGATTT	1	0	0
		ACCTGGCATACAATGTAGATTTC	1	4	1
		ACCTGGCATACAATGTAGATTTCT	1	1	0
		ACCTGGCATACAATGTAGATTTCTG	1	1	1
		Totals:	3	9	2
	mir-222-3p
		AGCTACATCTGGCTACTGG	1	0	1
		AGCTACATCTGGCTACTGGGT	1	4	1
		Totals:	1	4	2
	mir-223-3p
		GTCAGTTTGTCAAATACCCCA	1	1	0
		TGTCAGTTTGTCAAATACC	1	0	0
		TGTCAGTTTGTCAAATACCC	1	1	0
		TGTCAGTTTGTCAAATACCCC	1	2	0
		TGTCAGTTTGTCAAATACCCCA	1	5	1
		Totals:	4	9	1
	mir-223-5p
		CGTGTATTTGACAAGCTG	1	1	0
		CGTGTATTTGACAAGCTGAG	1	2	1
		CGTGTATTTGACAAGCTGAGT	1	0	1
		CGTGTATTTGACAAGCTGAGTTG	1	3	0
		Totals:	1	6	2
	mir-224-5p
		TAAGTCACTAGTGGTTCCGTT	1	1	0
		Totals:	1	1	0
	mir-23a-3p
		ATCACATTGCCAGGGATT	1	27	9
		ATCACATTGCCAGGGATTT	1	24	5
		ATCACATTGCCAGGGATTTC	1	93	7
		ATCACATTGCCAGGGATTTCC	1	177	14
		CACATTGCCAGGGATTTC	1	0	0
		TCACATTGCCAGGGATTTCC	1	1	0
		Totals:	5	322	35
	mir-23b-3p
		ATCACATTGCCAGGGATT	1	27	9
		ATCACATTGCCAGGGATTA	1	7	1
		ATCACATTGCCAGGGATTAC	1	23	7
		ATCACATTGCCAGGGATTACC	1	192	14
		TCACATTGCCAGGGATTA	1	1	0
		TCACATTGCCAGGGATTAC	1	1	0
		TCACATTGCCAGGGATTACC	1	2	0
		Totals:	5	253	31
	mir-23b-5p
		GGGTTCCTGGCATGCTGATT	1	0	0
		Totals:	1	0	0
	mir-24-1-5p
		GTGCCTACTGAGCTGATAT	1	0	0
		GTGCCTACTGAGCTGATATC	2	1	0
		GTGCCTACTGAGCTGATATCA	1	1	0
		GTGCCTACTGAGCTGATATCAG	1	0	0
		GTGCCTACTGAGCTGATATCAGT	1	2	0
		Totals:	5	4	0
	mir-24-2-5p
		GTGCCTACTGAGCTGAAA	1	2	0
		GTGCCTACTGAGCTGAAAC	2	21	2
		GTGCCTACTGAGCTGAAACA	2	3	0
		GTGCCTACTGAGCTGAAACAG	1	65	10
		GTGCCTACTGAGCTGAAACAGT	1	16	5
		Totals:	7	107	17
	mir-24-3p
		GGCTCAGTTCAGCAGGAAC	2	0	1
		GGCTCAGTTCAGCAGGAACA	1	1	0
		GGCTCAGTTCAGCAGGAACAG	1	1	0
		TGGCTCAGTTCAGCAGGA	1	5	0
		TGGCTCAGTTCAGCAGGAA	2	8	0
		TGGCTCAGTTCAGCAGGAAC	2	341	60
		TGGCTCAGTTCAGCAGGAACA	1	244	41
		TGGCTCAGTTCAGCAGGAACAG	1	771	115
		Totals:	8	1371	217
	mir-25-3p
		ATTGCACTTGTCTCGGTCTG	1	1	0
		CATTGCACTTGTCTCGGTC	1	0	0
		CATTGCACTTGTCTCGGTCT	1	26	4
		CATTGCACTTGTCTCGGTCTG	1	225	31
		CATTGCACTTGTCTCGGTCTGA	1	519	110
		GCACTTGTCTCGGTCTGA	1	1	0
		Totals:	4	772	145
	mir-25-5p
		AGGCGGAGACTTGGGCAATTG	1	0	0
		Totals:	1	0	0
	mir-26a-2-3p
		CCTGTTCTTGATTACTTGTTT	1	4	0
		CCTGTTCTTGATTACTTGTTTC	1	5	1
		Totals:	1	9	1
	mir-26a-5p
		AAGTAATCCAGGATAGGCT	1	1	1
		AGTAATCCAGGATAGGCT	1	1	0
		CAAGTAATCCAGGATAGG	1	1	0
		CAAGTAATCCAGGATAGGCT	1	1	0
		TCAAGTAATCCAGGATAGGC	1	1	0
		TCAAGTAATCCAGGATAGGCT	1	11	2
		TTCAAGTAATCCAGGATA	1	25	4
		TTCAAGTAATCCAGGATAG	1	51	1
		TTCAAGTAATCCAGGATAGG	1	600	21
		TTCAAGTAATCCAGGATAGGC	1	572	28
		TTCAAGTAATCCAGGATAGGCT	1	9176	1286
		Totals:	7	10440	1343
	mir-26b-3p
		CCTGTTCTCCATTACTTGGC	1	1	0
		CCTGTTCTCCATTACTTGGCT	1	5	0
		CCTGTTCTCCATTACTTGGCTC	1	2	0
		Totals:	1	8	0
	mir-26b-5p
		AAGTAATTCAGGATAGGT	1	0	1
		TCAAGTAATTCAGGATAGG	1	1	0
		TTCAAGTAATTCAGGATA	1	4	1
		TTCAAGTAATTCAGGATAG	1	3	2
		TTCAAGTAATTCAGGATAGG	1	218	15
		TTCAAGTAATTCAGGATAGGT	1	450	58
		Totals:	4	676	77
	mir-27a-3p
		TTCACAGTGGCTAAGTTC	1	20	2
		TTCACAGTGGCTAAGTTCC	1	19	7
		TTCACAGTGGCTAAGTTCCG	1	150	27
		TTCACAGTGGCTAAGTTCCGC	1	10	2
		Totals:	4	199	38
	mir-27a-5p
		AGGGCTTAGCTGCTTGTGAGC	1	3	0
		AGGGCTTAGCTGCTTGTGAGCA	1	14	1
		Totals:	2	17	1
	mir-27b-3p
		ACAGTGGCTAAGTTCTGC	1	1	0
		TTCACAGTGGCTAAGTTC	1	20	2
		TTCACAGTGGCTAAGTTCT	1	218	60
		TTCACAGTGGCTAAGTTCTG	1	1179	236
		TTCACAGTGGCTAAGTTCTGC	1	1275	195
		Totals:	5	2693	493
	mir-27b-5p
		AGAGCTTAGCTGATTGGTGAAC	1	1	0
		Totals:	1	1	0
	mir-28a-3p
		CACTAGATTGTGAGCTGCT	1	1	0
		CACTAGATTGTGAGCTGCTG	1	3	2
		CACTAGATTGTGAGCTGCTGG	1	12	0
		CACTAGATTGTGAGCTGCTGGA	1	46	6
		TAGATTGTGAGCTGCTGGA	1	1	0
		Totals:	4	63	8
	mir-28a-5p
		AAGGAGCTCACAGTCTAT	1	1	0
		AAGGAGCTCACAGTCTATT	1	1	1
		AAGGAGCTCACAGTCTATTG	1	24	1
		AAGGAGCTCACAGTCTATTGA	1	24	3
		AAGGAGCTCACAGTCTATTGAG	1	24	9
		Totals:	3	74	14
	mir-296-5p
		AGGGCCCCCCCTCAATCCTGT	1	1	0
		Totals:	1	1	0
	mir-298-5p
		GGCAGAGGAGGGCTGTTCTTC	1	2	0
		Totals:	1	2	0
	mir-299a-3p
		TATGTGGGACGGTAAACCGCT	1	1	0
		TATGTGGGACGGTAAACCGCTT	1	0	1
		Totals:	1	1	1
	mir-299a-5p
		TGGTTTACCGTCCCACATACA	1	3	0
		Totals:	1	3	0
	mir-29a-3p
		TAGCACCATCTGAAATCG	1	6	0
		TAGCACCATCTGAAATCGG	1	55	5
		TAGCACCATCTGAAATCGGT	1	36	2
		TAGCACCATCTGAAATCGGTT	1	331	44
		TAGCACCATCTGAAATCGGTTA	1	266	37
		Totals:	5	694	88
	mir-29a-5p
		ACTGATTTCTTTTGGTGTTC	1	1	0
		Totals:	1	1	0
	mir-29b-2-5p
		CTGGTTTCACATGGTGGCTTAGA	1	0	0
		Totals:	1	0	0
	mir-29b-3p
		TAGCACCATTTGAAATCAG	1	0	0
		TAGCACCATTTGAAATCAGT	1	1	0
		TAGCACCATTTGAAATCAGTG	1	2	0
		TAGCACCATTTGAAATCAGTGT	1	3	0
		TAGCACCATTTGAAATCAGTGTT	1	18	1
		Totals:	5	24	1
	mir-29c-3p
		TAGCACCATTTGAAATCGG	1	0	0
		TAGCACCATTTGAAATCGGT	1	5	0
		TAGCACCATTTGAAATCGGTT	1	11	2
		TAGCACCATTTGAAATCGGTTA	1	13	2
		Totals:	4	29	4
	mir-29c-5p
		ACCGATTTCTCCTGGTGTTC	1	2	0
		TGACCGATTTCTCCTGGTGTT	1	2	0
		TGACCGATTTCTCCTGGTGTTC	1	2	0
		Totals:	1	6	0
	mir-300-3p
		GCAAGGGCAAGCTCTCTTC	1	1	0
		TATGCAAGGGCAAGCTCTCTTC	1	7	0
		Totals:	2	8	0
	mir-301a-3p
		CAGTGCAATAGTATTGTCAAAGC	1	0	0
		Totals:	1	0	0
	mir-3064-3p
		TGCCACACTGCAACACCTTA	1	1	0
		Totals:	1	1	0
	mir-3064-5p
		TCTGGCTGTTGTGGTGTGCAAA	1	1	0
		Totals:	1	1	0
	mir-3068-3p
		GGTGAATTGCAGTACTCCA	1	1	0
		GGTGAATTGCAGTACTCCAA	1	1	0
		GGTGAATTGCAGTACTCCAAC	1	3	1
		GGTGAATTGCAGTACTCCAACA	1	5	0
		GTGAATTGCAGTACTCCAAC	1	1	0
		GTGAATTGCAGTACTCCAACA	1	0	0
		Totals:	3	11	1
	mir-3068-5p
		TGGAGTTCATGCAAGTTCTAAC	1	0	1
		TTGGAGTTCATGCAAGTTCT	1	1	0
		TTGGAGTTCATGCAAGTTCTA	1	2	0
		TTGGAGTTCATGCAAGTTCTAAC	1	7	0
		TTGGAGTTCATGCAAGTTCTAACC	1	4	0
		Totals:	3	14	1
	mir-3073a-3p
		TTGATGTCCACTGTGACCATA	1	1	0
		Totals:	1	1	0
	mir-3073b-3p
		CTGGCGCCAACTGTGACCACT	1	1	0
		Totals:	1	1	0
	mir-3074-5p
		GTTCCTGCTGAACTGAGCCA	1	1	0
		Totals:	1	1	0
	mir-3084-3p
		TTCTGCCAGTCTCCTTCAGAC	1	1	0
		Totals:	1	1	0
	mir-3084-5p
		GTTGAAGGTTAATTAGCAGAGT	1	2	0
		Totals:	1	2	0
	mir-3095-3p
		TGGACACTGGAGAGAGAGCTTT	1	1	0
		Totals:	1	1	0
	mir-30a-3p
		CTTTCAGTCGGATGTTTG	1	5	0
		CTTTCAGTCGGATGTTTGC	1	66	8
		CTTTCAGTCGGATGTTTGCA	1	56	8
		CTTTCAGTCGGATGTTTGCAG	1	110	23
		CTTTCAGTCGGATGTTTGCAGC	1	86	25
		TTCAGTCGGATGTTTGCAGC	1	1	0
		TTTCAGTCGGATGTTTGC	1	15	1
		TTTCAGTCGGATGTTTGCA	1	8	2
		TTTCAGTCGGATGTTTGCAG	1	87	12
		TTTCAGTCGGATGTTTGCAGC	1	53	6
		Totals:	8	487	85
	mir-30a-5p
		AAACATCCTCGACTGGAAG	1	0	0
		GTAAACATCCTCGACTGGA	1	2	0
		GTAAACATCCTCGACTGGAA	1	3	0
		GTAAACATCCTCGACTGGAAG	1	4	1
		TAAACATCCTCGACTGGAA	1	3	1
		TAAACATCCTCGACTGGAAG	1	1	0
		TGTAAACATCCTCGACTG	1	77	12
		TGTAAACATCCTCGACTGG	1	293	32
		TGTAAACATCCTCGACTGGA	1	768	121
		TGTAAACATCCTCGACTGGAA	1	1175	187
		TGTAAACATCCTCGACTGGAAG	1	4983	687
		Totals:	9	7309	1041
	mir-30b-3p
		CTGGGATGTGGATGTTTACGT	1	9	0
		CTGGGATGTGGATGTTTACGTC	1	0	0
		TGGGATGTGGATGTTTACGT	1	1	0
		Totals:	1	10	0
	mir-30b-5p
		GTAAACATCCTACACTCAGC	1	1	0
		TGTAAACATCCTACACTC	1	6	0
		TGTAAACATCCTACACTCA	1	1	0
		TGTAAACATCCTACACTCAG	1	0	0
		TGTAAACATCCTACACTCAGC	1	97	13
		TGTAAACATCCTACACTCAGCT	1	712	51
		Totals:	4	817	64
	mir-30c-1-3p
		CTGGGAGAGGGTTGTTTACTCC	1	0	2
		TGGGAGAGGGTTGTTTACTCC	1	1	0
		Totals:	1	1	2
	mir-30c-2-3p
		CTGGGAGAAGGCTGTTTAC	1	0	0
		CTGGGAGAAGGCTGTTTACT	1	10	5
		CTGGGAGAAGGCTGTTTACTC	1	46	11
		CTGGGAGAAGGCTGTTTACTCT	1	426	88
		TGGGAGAAGGCTGTTTACTC	1	1	1
		TGGGAGAAGGCTGTTTACTCT	1	30	1
		Totals:	6	513	106
	mir-30c-5p
		ACATCCTACACTCTCAGC	1	1	0
		TGTAAACATCCTACACTC	1	6	0
		TGTAAACATCCTACACTCT	1	16	2
		TGTAAACATCCTACACTCTC	1	61	6
		TGTAAACATCCTACACTCTCA	1	41	2
		TGTAAACATCCTACACTCTCAG	1	13	2
		TGTAAACATCCTACACTCTCAGC	1	1153	134
		Totals:	6	1291	146
	mir-30d-3p
		CTTTCAGTCAGATGTTTGC	1	0	0
		CTTTCAGTCAGATGTTTGCTG	1	1	0
		CTTTCAGTCAGATGTTTGCTGC	1	1	0
		Totals:	2	2	0
	mir-30d-5p
		TGTAAACATCCCCGACTG	1	9	0
		TGTAAACATCCCCGACTGG	1	51	10
		TGTAAACATCCCCGACTGGA	1	187	37
		TGTAAACATCCCCGACTGGAA	1	285	60
		TGTAAACATCCCCGACTGGAAG	1	1387	213
		Totals:	5	1919	320
	mir-30e-3p
		CTTTCAGTCGGATGTTTA	1	1	0
		CTTTCAGTCGGATGTTTAC	1	34	5
		CTTTCAGTCGGATGTTTACA	1	47	6
		CTTTCAGTCGGATGTTTACAG	1	70	10
		CTTTCAGTCGGATGTTTACAGC	1	71	25
		TTTCAGTCGGATGTTTAC	2	1	0
		TTTCAGTCGGATGTTTACA	1	0	1
		TTTCAGTCGGATGTTTACAG	1	2	0
		TTTCAGTCGGATGTTTACAGC	1	4	0
		Totals:	4	230	47
	mir-30e-5p
		TGTAAACATCCTTGACTG	1	9	0
		TGTAAACATCCTTGACTGG	1	16	1
		TGTAAACATCCTTGACTGGA	1	22	3
		TGTAAACATCCTTGACTGGAA	1	15	1
		TGTAAACATCCTTGACTGGAAG	1	152	20
		Totals:	5	214	25
	mir-31-3p
		TGCTATGCCAACATATTGCCAT	1	5	0
		Totals:	1	5	0
	mir-31-5p
		AGGCAAGATGCTGGCATA	1	2	1
		AGGCAAGATGCTGGCATAG	1	0	0
		AGGCAAGATGCTGGCATAGC	1	4	1
		AGGCAAGATGCTGGCATAGCT	1	14	4
		AGGCAAGATGCTGGCATAGCTG	1	22	1
		Totals:	5	42	7
	mir-3105-3p
		ACTGCTTATGAGCTTGCACTC	1	0	0
		ACTGCTTATGAGCTTGCACTCC	1	3	0
		Totals:	2	3	0
	mir-3105-5p
		AGAGCAAGCCCGTAAGCAGCGT	1	1	0
		Totals:	1	1	0
	mir-3107-5p
		TCCTGTACTGAGCTGCCC	1	3	0
		TCCTGTACTGAGCTGCCCC	4	1	0
		TCCTGTACTGAGCTGCCCCG	1	51	10
		TCCTGTACTGAGCTGCCCCGA	2	187	18
		TCCTGTACTGAGCTGCCCCGAG	2	475	72
		Totals:	5	717	100
	mir-32-3p
		CAATTTAGTGTGTGTGATATT	1	1	0
		Totals:	1	1	0
	mir-32-5p
		TATTGCACATTACTAAGTTG	1	1	0
		TATTGCACATTACTAAGTTGC	1	17	3
		TATTGCACATTACTAAGTTGCA	1	24	2
		Totals:	3	42	5
	mir-320-3p
		AAAAGCTGGGTTGAGAGG	1	0	0
		AAAAGCTGGGTTGAGAGGG	1	1	0
		AAAAGCTGGGTTGAGAGGGC	1	0	1
		AAAAGCTGGGTTGAGAGGGCG	1	8	2
		AAAAGCTGGGTTGAGAGGGCGA	1	51	5
		AAAGCTGGGTTGAGAGGGC	1	1	0
		AAAGCTGGGTTGAGAGGGCG	1	1	0
		AAAGCTGGGTTGAGAGGGCGA	1	3	1
		Totals:	5	65	9
	mir-322-3p
		AAACATGAAGCGCTGCAAC	1	13	2
		AAACATGAAGCGCTGCAACA	1	46	9
		AAACATGAAGCGCTGCAACAC	1	34	3
		Totals:	3	93	14
	mir-322-5p
		CAGCAGCAATTCATGTTTTG	1	0	0
		CAGCAGCAATTCATGTTTTGG	1	1	0
		CAGCAGCAATTCATGTTTTGGA	1	3	1
		Totals:	3	4	1
	mir-324-3p
		CCACTGCCCCAGGTGCTGCT	1	0	0
		Totals:	1	0	0
	mir-324-5p
		CGCATCCCCTAGGGCATTGGTGT	1	3	0
		Totals:	1	3	0
	mir-326-3p
		CCTCTGGGCCCTTCCTCC	1	1	0
		CCTCTGGGCCCTTCCTCCAG	1	3	0
		CCTCTGGGCCCTTCCTCCAGT	1	9	1
		Totals:	2	13	1
	mir-328-3p
		CTGGCCCTCTCTGCCCTTCCG	1	2	1
		CTGGCCCTCTCTGCCCTTCCGT	1	12	1
		Totals:	1	14	2
	mir-329-3p
		AACACACCCAGCTAACCTTTTT	1	0	1
		Totals:	1	0	1
	mir-33-3p
		CAATGTTTCCACAGTGCATCA	1	3	0
		Totals:	1	3	0
	mir-33-5p
		GTGCATTGTAGTTGCATTG	1	1	0
		GTGCATTGTAGTTGCATTGC	1	0	0
		GTGCATTGTAGTTGCATTGCA	1	0	0
		Totals:	2	1	0
	mir-330-5p
		TCTCTGGGCCTGTGTCTTA	1	1	0
		TCTCTGGGCCTGTGTCTTAG	1	0	0
		TCTCTGGGCCTGTGTCTTAGG	1	2	0
		Totals:	1	3	0
	mir-331-3p
		CCCCTGGGCCTATCCTAGAA	1	0	0
		GCCCCTGGGCCTATCCTAGA	1	1	0
		Totals:	2	1	0
	mir-335-3p
		TTTTTCATTATTGCTCCTGAC	1	1	1
		TTTTTCATTATTGCTCCTGACC	1	11	3
		Totals:	2	12	4
	mir-335-5p
		TCAAGAGCAATAACGAAAAAT	1	1	1
		TCAAGAGCAATAACGAAAAATG	1	2	1
		TCAAGAGCAATAACGAAAAATGT	1	1	0
		Totals:	2	4	2
	mir-338-3p
		TCCAGCATCAGTGATTTTGT	1	0	0
		TCCAGCATCAGTGATTTTGTT	1	0	0
		TCCAGCATCAGTGATTTTGTTG	1	0	0
		Totals:	3	0	0
	mir-338-5p
		AACAATATCCTGGTGCTGAG	1	0	0
		AACAATATCCTGGTGCTGAGT	1	3	0
		AACAATATCCTGGTGCTGAGTG	1	0	0
		Totals:	3	3	0
	mir-339-3p
		TGAGCGCCTCGGCGACAGAG	1	0	1
		TGAGCGCCTCGGCGACAGAGC	1	0	1
		TGAGCGCCTCGGCGACAGAGCCG	1	0	0
		Totals:	1	0	2
	mir-339-5p
		CCTGTCCTCCAGGAGCTCACG	1	1	0
		TCCCTGTCCTCCAGGAGCTC	1	6	0
		TCCCTGTCCTCCAGGAGCTCA	1	3	1
		TCCCTGTCCTCCAGGAGCTCAC	1	1	0
		TCCCTGTCCTCCAGGAGCTCACG	1	8	0
		Totals:	3	19	1
	mir-340-3p
		CCGTCTCAGTTACTTTATAGC	1	0	0
		TCCGTCTCAGTTACTTTATAG	1	4	1
		TCCGTCTCAGTTACTTTATAGC	1	13	8
		Totals:	3	17	9
	mir-340-5p
		TAAAGCAATGAGACTGATT	1	1	0
		TATAAAGCAATGAGACTGATT	1	0	0
		TTATAAAGCAATGAGACT	1	1	0
		TTATAAAGCAATGAGACTG	1	20	5
		TTATAAAGCAATGAGACTGA	1	48	5
		TTATAAAGCAATGAGACTGAT	1	68	18
		TTATAAAGCAATGAGACTGATT	1	378	77
		Totals:	5	516	105
	mir-341-3p
		TCGGTCGATCGGTCGGTCGGT	1	2	0
		Totals:	1	2	0
	mir-342-3p
		TCTCACACAGAAATCGCACCC	1	0	0
		TCTCACACAGAAATCGCACCCG	1	3	0
		TCTCACACAGAAATCGCACCCGT	1	16	0
		Totals:	3	19	0
	mir-342-5p
		AGGGGTGCTATCTGTGATTGA	1	1	0
		AGGGGTGCTATCTGTGATTGAG	1	0	0
		Totals:	1	1	0
	mir-344-3p
		TGATCTAGCCAAAGCCTGACTGT	1	0	1
		Totals:	1	0	1
	mir-345-3p
		CCTGAACTAGGGGTCTGGAGA	1	3	1
		Totals:	1	3	1
	mir-345-5p
		GCTGACCCCTAGTCCAGTGC	1	0	0
		GCTGACCCCTAGTCCAGTGCT	1	1	0
		Totals:	2	1	0
	mir-3470a
		ACTTTGTAGACCAGGCTG	1	0	1
		CACTTTGTAGACCAGGCT	1	1	2
		CACTTTGTAGACCAGGCTG	1	1	2
		CACTTTGTAGACCAGGCTGG	1	0	1
		Totals:	1	2	6
	mir-3470b
		ACTCTGTAGACCAGGCTG	1	0	1
		ACTCTGTAGACCAGGCTGG	1	0	1
		CACTCTGTAGACCAGGCT	1	1	0
		CACTCTGTAGACCAGGCTG	1	1	1
		Totals:	3	2	3
	mir-34a-5p
		TGGCAGTGTCTTAGCTGGTTG	1	0	0
		TGGCAGTGTCTTAGCTGGTTGT	1	3	0
		Totals:	2	3	0
	mir-34c-5p
		AGGCAGTGTAGTTAGCTGATT	1	1	0
		AGGCAGTGTAGTTAGCTGATTG	1	1	0
		AGGCAGTGTAGTTAGCTGATTGC	1	2	0
		Totals:	2	4	0
	mir-350-3p
		TTCACAAAGCCCATACACTTT	1	1	0
		TTCACAAAGCCCATACACTTTC	1	7	1
		Totals:	2	8	1
	mir-351-5p
		TCCCTGAGGAGCCCTTTG	1	0	0
		TCCCTGAGGAGCCCTTTGA	1	1	0
		TCCCTGAGGAGCCCTTTGAG	1	4	1
		TCCCTGAGGAGCCCTTTGAGC	1	0	1
		TCCCTGAGGAGCCCTTTGAGCC	1	1	0
		TCCCTGAGGAGCCCTTTGAGCCT	1	4	0
		TCCCTGAGGAGCCCTTTGAGCCTG	1	5	2
		Totals:	3	15	4
	mir-3535
		ATATGATGACTGATTACCTGAG	1	1	0
		ATATGATGACTGATTACCTGAGA	1	1	0
		GGATATGATGACTGATTACCTGA	1	1	0
		GGATATGATGACTGATTACCTGAGA	1	6	0
		TGGATATGATGACTGATT	1	4	0
		TGGATATGATGACTGATTA	1	2	0
		TGGATATGATGACTGATTACC	1	7	4
		TGGATATGATGACTGATTACCT	1	0	1
		TGGATATGATGACTGATTACCTG	1	2	1
		TGGATATGATGACTGATTACCTGA	1	1	0
		TGGATATGATGACTGATTACCTGAG	1	5	3
		Totals:	4	30	9
	mir-361-3p
		AGGTGTGATTCTGATTTGT	1	1	0
		CCCCCAGGTGTGATTCTGATT	1	1	0
		CCCCCAGGTGTGATTCTGATTT	1	4	0
		CCCCCAGGTGTGATTCTGATTTG	1	2	0
		CCCCCAGGTGTGATTCTGATTTGT	1	40	8
		TCCCCCAGGTGTGATTCTGA	1	1	0
		TCCCCCAGGTGTGATTCTGAT	1	4	1
		TCCCCCAGGTGTGATTCTGATT	1	16	9
		TCCCCCAGGTGTGATTCTGATTT	1	21	8
		TCCCCCAGGTGTGATTCTGATTTG	1	9	1
		TCCCCCAGGTGTGATTCTGATTTGT	1	26	6
		Totals:	8	125	33
	mir-361-5p
		TTATCAGAATCTCCAGGGG	1	0	1
		TTATCAGAATCTCCAGGGGT	1	5	1
		TTATCAGAATCTCCAGGGGTA	1	3	0
		TTATCAGAATCTCCAGGGGTAC	1	19	3
		Totals:	3	27	5
	mir-362-3p
		AACACACCTGTTCAAGGATTC	1	2	0
		AACACACCTGTTCAAGGATTCA	1	0	0
		Totals:	2	2	0
	mir-362-5p
		AATCCTTGGAACCTAGGTGTG	1	2	0
		AATCCTTGGAACCTAGGTGTGA	1	1	1
		AATCCTTGGAACCTAGGTGTGAAT	1	8	0
		Totals:	3	11	1
	mir-365-2-5p
		AGGGACTTTCAGGGGCAGCTGT	1	1	0
		AGGGACTTTCAGGGGCAGCTGTG	1	0	1
		Totals:	1	1	1
	mir-365-3p
		TAATGCCCCTAAAAATCC	1	1	0
		TAATGCCCCTAAAAATCCT	1	0	0
		TAATGCCCCTAAAAATCCTT	1	3	2
		TAATGCCCCTAAAAATCCTTA	1	18	2
		TAATGCCCCTAAAAATCCTTAT	1	44	9
		Totals:	4	66	13
	mir-369-3p
		AATAATACATGGTTGATCTTT	1	1	0
		Totals:	1	1	0
	mir-369-5p
		AGATCGACCGTGTTATATTCG	1	1	0
		Totals:	1	1	0
	mir-374b-5p
		ATAATACAACCTGCTAAGTG	2	0	0
		ATATAATACAACCTGCTAAG	1	3	0
		ATATAATACAACCTGCTAAGT	1	21	3
		ATATAATACAACCTGCTAAGTG	1	68	11
		TATAATACAACCTGCTAAGTG	1	1	0
		Totals:	5	93	14
	mir-374c-5p
		ATAATACAACCTGCTAAGTG	1	0	0
		Totals:	1	0	0
	mir-375-3p
		GTTCGTTCGGCTCGCGTGA	1	1	0
		TTGTTCGTTCGGCTCGCGTG	1	2	0
		TTGTTCGTTCGGCTCGCGTGA	1	4	0
		TTTGTTCGTTCGGCTCGCG	1	3	0
		TTTGTTCGTTCGGCTCGCGT	1	1	0
		TTTGTTCGTTCGGCTCGCGTG	1	28	0
		TTTGTTCGTTCGGCTCGCGTGA	1	139	0
		Totals:	1	178	0
	mir-376c-3p
		AACATAGAGGAAATTTCACGT	1	1	0
		Totals:	1	1	0
	mir-378a-3p
		ACTGGACTTGGAGTCAGA	1	137	28
		ACTGGACTTGGAGTCAGAA	2	107	11
		ACTGGACTTGGAGTCAGAAG	2	368	61
		ACTGGACTTGGAGTCAGAAGG	1	2175	280
		CTGGACTTGGAGTCAGAA	3	1	0
		CTGGACTTGGAGTCAGAAG	3	4	0
		CTGGACTTGGAGTCAGAAGG	1	57	15
		TGGACTTGGAGTCAGAAGG	1	0	0
		Totals:	11	2849	395
	mir-378a-5p
		CTCCTGACTCCAGGTCCTGT	1	1	0
		CTCCTGACTCCAGGTCCTGTG	1	5	0
		CTCCTGACTCCAGGTCCTGTGT	1	40	10
		TCCTGACTCCAGGTCCTGTG	1	1	0
		TCCTGACTCCAGGTCCTGTGT	1	0	0
		Totals:	4	47	10
	mir-378b
		CTGGACTTGGAGTCAGAA	1	1	0
		CTGGACTTGGAGTCAGAAG	1	4	0
		CTGGACTTGGAGTCAGAAGA	1	1	0
		Totals:	2	6	0
	mir-378c
		ACTGGACTTGGAGTCAGA	1	137	28
		ACTGGACTTGGAGTCAGAA	2	107	11
		ACTGGACTTGGAGTCAGAAG	2	368	61
		ACTGGACTTGGAGTCAGAAGC	1	19	1
		CTGGACTTGGAGTCAGAA	3	1	0
		CTGGACTTGGAGTCAGAAG	3	4	0
		CTGGACTTGGAGTCAGAAGC	1	1	0
		Totals:	10	637	101
	mir-378d
		ACTGGCCTTGGAGTCAGA	1	1	0
		ACTGGCCTTGGAGTCAGAAGG	1	1	0
		Totals:	2	2	0
	mir-379-3p
		TATGTAACATGGTCCACTAA	1	1	0
		Totals:	1	1	0
	mir-379-5p
		TGGTAGACTATGGAACGT	1	3	0
		TGGTAGACTATGGAACGTA	1	3	0
		TGGTAGACTATGGAACGTAG	1	12	2
		TGGTAGACTATGGAACGTAGG	1	127	30
		Totals:	2	145	32
	mir-380-5p
		ATGGTTGACCATAGAACATG	1	1	0
		Totals:	1	1	0
	mir-381-3p
		TATACAAGGGCAAGCTCTCTG	1	2	0
		TATACAAGGGCAAGCTCTCTGT	1	24	2
		Totals:	1	26	2
	mir-382-5p
		GAAGTTGTTCGTGGTGGATTC	1	1	0
		GAAGTTGTTCGTGGTGGATTCG	1	3	0
		Totals:	2	4	0
	mir-409-3p
		GAATGTTGCTCGGTGAACCCCT	1	0	1
		Totals:	1	0	1
	mir-409-5p
		AGGTTACCCGAGCAACTTTGC	1	0	1
		Totals:	1	0	1
	mir-411-3p
		TATGTAACACGGTCCACTAAC	1	0	1
		Totals:	1	0	1
	mir-411-5p
		TAGTAGACCGTATAGCGTA	1	1	1
		TAGTAGACCGTATAGCGTAC	1	3	0
		TAGTAGACCGTATAGCGTACG	1	13	1
		Totals:	2	17	2
	mir-412-5p
		TGGTCGACCAGCTGGAAAGTAAT	1	1	0
		Totals:	1	1	0
	mir-421-3p
		ATCAACAGACATTAATTGGGC	1	1	0
		ATCAACAGACATTAATTGGGCG	1	1	0
		Totals:	1	2	0
	mir-423-3p
		AGCTCGGTCTGAGGCCCC	1	0	0
		AGCTCGGTCTGAGGCCCCTC	1	5	1
		AGCTCGGTCTGAGGCCCCTCA	1	5	3
		AGCTCGGTCTGAGGCCCCTCAG	1	6	2
		AGCTCGGTCTGAGGCCCCTCAGT	1	70	35
		Totals:	5	86	41
	mir-423-5p
		TGAGGGGCAGAGAGCGAG	1	1	0
		TGAGGGGCAGAGAGCGAGA	1	2	0
		TGAGGGGCAGAGAGCGAGAC	1	2	0
		TGAGGGGCAGAGAGCGAGACT	1	16	8
		TGAGGGGCAGAGAGCGAGACTT	1	17	3
		TGAGGGGCAGAGAGCGAGACTTT	1	82	18
		Totals:	4	120	29
	mir-425-3p
		ATCGGGAATGTCGTGTCCGCC	1	1	0
		Totals:	1	1	0
	mir-425-5p
		AATGACACGATCACTCCCGT	1	0	2
		AATGACACGATCACTCCCGTT	1	10	4
		AATGACACGATCACTCCCGTTG	1	22	2
		AATGACACGATCACTCCCGTTGA	1	13	2
		ATGACACGATCACTCCCGTTG	1	1	0
		Totals:	4	46	10
	mir-429-3p
		TAATACTGTCTGGTAATGCC	1	2	0
		TAATACTGTCTGGTAATGCCG	1	10	1
		TAATACTGTCTGGTAATGCCGT	1	45	10
		Totals:	3	57	11
	mir-431-5p
		TGTCTTGCAGGCCGTCATGCA	1	0	0
		Totals:	1	0	0
	mir-434-3p
		TTTGAACCATCACTCGACT	1	3	0
		TTTGAACCATCACTCGACTC	1	1	0
		TTTGAACCATCACTCGACTCC	1	2	0
		TTTGAACCATCACTCGACTCCT	1	3	0
		Totals:	4	9	0
	mir-434-5p
		GCTCGACTCATGGTTTGAAC	1	1	0
		GCTCGACTCATGGTTTGAACC	1	17	1
		GCTCGACTCATGGTTTGAACCA	1	19	1
		Totals:	2	37	2
	mir-450a-1-3p
		ATTGGGAACATTTTGCATAA	1	0	0
		Totals:	1	0	0
	mir-450a-5p
		TTTTGCGATGTGTTCCTAAT	1	5	3
		TTTTGCGATGTGTTCCTAATA	1	6	0
		TTTTGCGATGTGTTCCTAATAT	1	7	3
		Totals:	3	18	6
	mir-450b-5p
		TTTTGCAGTATGTTCCTGAAT	1	1	0
		TTTTGCAGTATGTTCCTGAATA	1	1	0
		Totals:	1	2	0
	mir-451a
		AAACCGTTACCATTACTG	1	29	5
		AAACCGTTACCATTACTGA	1	4	0
		AAACCGTTACCATTACTGAG	1	22	5
		AAACCGTTACCATTACTGAGT	1	776	121
		AAACCGTTACCATTACTGAGTT	1	239	22
		AACCGTTACCATTACTGA	1	0	0
		ACCGTTACCATTACTGAGT	1	0	0
		CCGTTACCATTACTGAGT	1	0	1
		Totals:	8	1070	154
	mir-452-3p
		TCAGTCTCATCTGCAAAGAGGT	1	1	0
		Totals:	1	1	0
	mir-455-3p
		GCAGTCCACGGGCATATACAC	1	1	0
		Totals:	1	1	0
	mir-455-5p
		TATGTGCCTTTGGACTACA	1	0	0
		TATGTGCCTTTGGACTACAT	1	0	0
		TATGTGCCTTTGGACTACATC	1	1	0
		TATGTGCCTTTGGACTACATCG	1	39	4
		Totals:	3	40	4
	mir-466a-3p
		TACATACACGCACACATAAGA	1	1	0
		Totals:	1	1	0
	mir-466b-3p
		TACATACACGCACACATAAGA	1	1	0
		Totals:	1	1	0
	mir-466c-3p
		TACATACACGCACACATAAGA	1	1	0
		Totals:	1	1	0
	mir-466c-5p
		TGATGTGTGTGTGCATGTAC	1	0	0
		Totals:	1	0	0
	mir-466e-3p
		TACATACACGCACACATAAGA	1	1	0
		Totals:	1	1	0
	mir-466p-3p
		TACATACACGCACACATAAGA	1	1	0
		Totals:	1	1	0
	mir-467a-3p
		ATATACATACACACACCTACA	1	2	0
		Totals:	1	2	0
	mir-467a-5p
		TAAGTGCCTGCATGTATATG	1	0	0
		TAAGTGCCTGCATGTATATGC	1	3	0
		TAAGTGCCTGCATGTATATGCG	1	0	0
		Totals:	3	3	0
	mir-467b-5p
		TAAGTGCCTGCATGTATATG	1	0	0
		Totals:	1	0	0
	mir-467d-3p
		ATATACATACACACACCTACA	1	2	0
		Totals:	1	2	0
	mir-467d-5p
		TAAGTGCGCGCATGTATATGC	1	0	0
		Totals:	1	0	0
	mir-467e-5p
		ATAAGTGTGAGCATGTATATGT	1	1	0
		Totals:	1	1	0
	mir-470-5p
		TTCTTGGACTGGCACTGGTGAGT	1	0	1
		Totals:	1	0	1
	mir-484
		TCAGGCTCAGTCCCCTCC	1	1	0
		TCAGGCTCAGTCCCCTCCCG	1	1	0
		TCAGGCTCAGTCCCCTCCCGA	1	6	1
		TCAGGCTCAGTCCCCTCCCGAT	1	22	3
		Totals:	2	30	4
	mir-485-5p
		AGAGGCTGGCCGTGATGAATTC	1	1	0
		Totals:	1	1	0
	mir-486-3p
		CGGGGCAGCTCAGTACAGGAT	1	2	0
		Totals:	1	2	0
	mir-486-5p
		TCCTGTACTGAGCTGCCC	1	3	0
		TCCTGTACTGAGCTGCCCC	4	1	0
		TCCTGTACTGAGCTGCCCCG	1	51	10
		TCCTGTACTGAGCTGCCCCGA	2	187	18
		TCCTGTACTGAGCTGCCCCGAG	2	475	72
		Totals:	5	717	100
	mir-491-3p
		TTATGCAAGATTCCCTTCTAC	1	1	0
		Totals:	1	1	0
	mir-491-5p
		AGTGGGGAACCCTTCCATGAGG	1	1	0
		Totals:	1	1	0
	mir-495-3p
		AAACAAACATGGTGCACTTCTT	1	1	0
		AACAAACATGGTGCACTTCTT	1	1	0
		Totals:	2	2	0
	mir-497b
		CACCACAGTGTGGTTTGGACGTGG	1	0	0
		Totals:	1	0	0
	mir-499-5p
		TTAAGACTTGCAGTGATGTT	1	1	0
		Totals:	1	1	0
	mir-500-3p
		AATGCACCTGGGCAAGGGTT	1	0	0
		AATGCACCTGGGCAAGGGTTC	1	3	0
		AATGCACCTGGGCAAGGGTTCA	1	1	0
		Totals:	2	4	0
	mir-501-3p
		AATGCACCCGGGCAAGGATT	1	0	0
		AATGCACCCGGGCAAGGATTT	1	1	0
		AATGCACCCGGGCAAGGATTTG	1	8	0
		Totals:	2	9	0
	mir-501-5p
		AATCCTTTGTCCCTGGGTGA	1	1	0
		AATCCTTTGTCCCTGGGTGAAA	1	1	0
		Totals:	2	2	0
	mir-503-3p
		GAGTATTGTTTCCACTGCCTGG	1	0	0
		Totals:	1	0	0
	mir-505-3p
		CGTCAACACTTGCTGGTTTTCT	1	0	0
		Totals:	1	0	0
	mir-5099
		TAGATCGATGTGGTGCTC	1	1	0
		TAGATCGATGTGGTGCTCC	1	1	0
		TTAGATCGATGTGGTGCT	1	2	0
		TTAGATCGATGTGGTGCTC	1	5	0
		TTAGATCGATGTGGTGCTCC	1	1	0
		Totals:	2	10	0
	mir-511-3p
		AATGTGTAGCAAAAGACAGG	1	0	0
		AATGTGTAGCAAAAGACAGGAT	1	0	2
		ATGTGTAGCAAAAGACAGGAT	1	1	1
		Totals:	3	1	3
	mir-5114
		ACTGGAGACGGAAGCTGCAAGA	1	1	0
		Totals:	1	1	0
	mir-5121
		GCTTGTGATGAGACATCT	1	1	0
		GCTTGTGATGAGACATCTCC	1	1	0
		Totals:	2	2	0
	mir-5123
		TGTAGATCCATATGCCATGGT	1	1	0
		Totals:	1	1	0
	mir-5129-3p
		AATGTGCCTGTGCATCTCTTCC	1	1	0
		Totals:	1	1	0
	mir-532-3p
		CCTCCCACACCCAAGGCTTG	1	1	0
		CCTCCCACACCCAAGGCTTGC	1	5	1
		CCTCCCACACCCAAGGCTTGCA	1	4	0
		Totals:	2	10	1
	mir-532-5p
		ATGCCTTGAGTGTAGGACCGT	1	4	0
		CATGCCTTGAGTGTAGGAC	1	0	0
		CATGCCTTGAGTGTAGGACC	1	7	0
		CATGCCTTGAGTGTAGGACCG	1	19	2
		CATGCCTTGAGTGTAGGACCGT	1	493	127
		GCCTTGAGTGTAGGACCG	1	1	0
		Totals:	3	524	129
	mir-541-5p
		AAGGGATTCTGATGTTGG	1	0	1
		AAGGGATTCTGATGTTGGT	1	1	0
		AAGGGATTCTGATGTTGGTC	1	8	1
		AAGGGATTCTGATGTTGGTCA	1	6	0
		AAGGGATTCTGATGTTGGTCAC	1	1	0
		AAGGGATTCTGATGTTGGTCACA	1	4	0
		AAGGGATTCTGATGTTGGTCACAC	1	3	2
		AAGGGATTCTGATGTTGGTCACACT	1	8	1
		Totals:	4	31	5
	mir-542-3p
		TGTGACAGATTGATAACTG	1	0	1
		TGTGACAGATTGATAACTGA	1	12	2
		TGTGACAGATTGATAACTGAA	1	6	4
		TGTGACAGATTGATAACTGAAA	1	11	2
		Totals:	3	29	9
	mir-547-3p
		CTTGGTACATCTTTGAGTGAG	1	0	0
		Totals:	1	0	0
	mir-551b-3p
		GCGACCCATACTTGGTTTCAG	1	1	0
		Totals:	1	1	0
	mir-5615-5p
		CTTGGTTGTTTTCTGAGACA	1	1	0
[truncated: 303 more rows]

## Sheet: normalized expression
DENV1-DENVC normalized expression data
Normalised count: count of matching sequence reads normalised to total number of reads after last filtering step (see table below). Given in parts per million
miRNA Code		Genome Matches	Raw Expression		Normalized Read Count	Normalized Expression (TPM)		Fold Change
			DENVC (Uninfected control)	DENV-1	DENV-1	DENVC (Uninfected control)	DENV-1
let-7a-1-3p	Totals:	3	4	3	12.8881	6.98244	22.4975	3.22202
let-7a-5p	Totals:	7	5265	1295	5563.35	9190.63	9711.43	1.05667
let-7b-3p	Totals:	1	1	0	0	1.74561	0	0
let-7b-5p	Totals:	6	970	189	811.948	1693.24	1417.34	0.83706
let-7c-2-3p	Totals:	3	4	3	12.8881	6.98244	22.4975	3.22202
let-7c-5p	Totals:	6	7073	1826	7844.54	12346.7	13693.5	1.10908
let-7d-3p	Totals:	3	7	0	0	12.2193	0	0
let-7d-5p	Totals:	6	929	174	747.508	1621.67	1304.86	0.804637
let-7e-3p	Totals:	1	2	2	8.59204	3.49122	14.9984	4.29602
let-7e-5p	Totals:	4	108	19	81.6244	188.526	142.484	0.755782
let-7f-1-3p	Totals:	1	1	0	0	1.74561	0	0
let-7f-2-3p	Totals:	1	1	0	0	1.74561	0	0
let-7f-5p	Totals:	9	33130	6279	26974.7	57832	47087.3	0.814208
let-7g-5p	Totals:	6	20214	4156	17854.3	35285.7	31166.6	0.883263
let-7i-3p	Totals:	1	1	0	0	1.74561	0	0
let-7i-5p	Totals:	5	4569	1036	4450.68	7975.69	7769.15	0.974104
mir-100-5p	Totals:	6	1980	366	1572.34	3456.31	2744.7	0.794113
mir-101a-3p	Totals:	4	6248	730	3136.1	10906.6	5474.4	0.501936
mir-101b-3p	Totals:	7	6568	957	4111.29	11465.2	7176.71	0.625958
mir-103-3p	Totals:	6	1021	155	665.883	1782.27	1162.37	0.652188
mir-106a-5p	Totals:	1	1	0	0	1.74561	0	0
mir-106b-3p	Totals:	2	44	10	42.9602	76.8068	74.9918	0.976369
mir-106b-5p	Totals:	3	31	5	21.4801	54.1139	37.4959	0.692907
mir-107-3p	Totals:	6	142	21	90.2165	247.876	157.483	0.635327
mir-10a-3p	Totals:	3	7	4	17.1841	12.2193	29.9967	2.45487
mir-10a-5p	Totals:	13	13392	2758	11848.4	23377.2	20682.7	0.884739
mir-10b-5p	Totals:	4	352	53	227.689	614.454	397.456	0.646844
mir-1191	Totals:	1	2	1	4.29602	3.49122	7.49918	2.14801
mir-1198-3p	Totals:	1	0	0	0	0	0	#DIV/0!
mir-1198-5p	Totals:	2	15	4	17.1841	26.1841	29.9967	1.14561
mir-122-3p	Totals:	3	20	8	34.3682	34.9122	59.9934	1.71841
mir-122-5p	Totals:	7	140839	41394	177830	245850	310421	1.26264
mir-1247-3p	Totals:	2	1	0	0	1.74561	0	0
mir-1249-3p	Totals:	1	1	1	4.29602	1.74561	7.49918	4.29602
mir-1258-5p	Totals:	1	1	0	0	1.74561	0	0
mir-125a-5p	Totals:	6	203	55	236.281	354.359	412.455	1.16395
mir-125b-1-3p	Totals:	2	3	1	4.29602	5.23683	7.49918	1.43201
mir-125b-2-3p	Totals:	3	12	2	8.59204	20.9473	14.9984	0.716004
mir-125b-5p	Totals:	7	387	55	236.281	675.551	412.455	0.610546
mir-126a-3p	Totals:	10	10448	1640	7045.48	18238.1	12298.6	0.674337
mir-126a-5p	Totals:	5	533	60	257.761	930.41	449.951	0.483605
mir-127-3p	Totals:	2	41	7	30.0722	71.57	52.4942	0.733467
mir-127-5p	Totals:	1	0	0	0	0	0	#DIV/0!
mir-128-3p	Totals:	3	18	3	12.8881	31.421	22.4975	0.716004
mir-129-5p	Totals:	1	0	0	0	0	0	#DIV/0!
mir-1291	Totals:	2	2	0	0	3.49122	0	0
mir-1306-3p	Totals:	1	1	0	0	1.74561	0	0
mir-130a-3p	Totals:	4	27	9	38.6642	47.1314	67.4926	1.43201
mir-130a-5p	Totals:	1	0	1	4.29602	0	7.49918	#DIV/0!
mir-130b-5p	Totals:	1	0	0	0	0	0	#DIV/0!
mir-132-3p	Totals:	1	2	0	0	3.49122	0	0
mir-132-5p	Totals:	6	4	0	0	6.98244	0	0
mir-133a-3p	Totals:	7	42	0	0	73.3156	0	0
mir-133b-3p	Totals:	6	7	0	0	12.2193	0	0
mir-134-3p	Totals:	1	1	0	0	1.74561	0	0
mir-134-5p	Totals:	1	5	0	0	8.72804	0	0
mir-135a-5p	Totals:	1	1	0	0	1.74561	0	0
mir-136-3p	Totals:	1	2	0	0	3.49122	0	0
mir-136-5p	Totals:	1	5	0	0	8.72804	0	0
mir-137-3p	Totals:	1	3	0	0	5.23683	0	0
mir-137-5p	Totals:	2	2	0	0	3.49122	0	0
mir-139-5p	Totals:	4	79	7	30.0722	137.903	52.4942	0.38066
mir-140-3p	Totals:	6	391	64	274.945	682.533	479.947	0.703185
mir-140-5p	Totals:	2	32	5	21.4801	55.8595	37.4959	0.671254
mir-141-3p	Totals:	1	3	0	0	5.23683	0	0
mir-141-5p	Totals:	1	1	0	0	1.74561	0	0
mir-142-3p	Totals:	7	48	8	34.3682	83.7892	59.9934	0.716004
mir-142-5p	Totals:	5	13	1	4.29602	22.6929	7.49918	0.330463
mir-143-3p	Totals:	8	16786	3026	12999.8	29301.8	22692.5	0.774441
mir-143-5p	Totals:	1	22	2	8.59204	38.4034	14.9984	0.390547
mir-144-3p	Totals:	2	62	18	77.3284	108.228	134.985	1.24723
mir-144-5p	Totals:	5	90	10	42.9602	157.105	74.9918	0.477336
mir-145a-3p	Totals:	4	96	18	77.3284	167.578	134.985	0.805504
mir-145a-5p	Totals:	7	1250	189	811.948	2182.01	1417.34	0.649559
mir-145b	Totals:	1	0	0	0	0	0	#DIV/0!
mir-146a-5p	Totals:	1	14	4	17.1841	24.4385	29.9967	1.22743
mir-146b-5p	Totals:	2	23	3	12.8881	40.149	22.4975	0.560351
mir-147-3p	Totals:	1	0	1	4.29602	0	7.49918	#DIV/0!
mir-148a-3p	Totals:	10	184371	48285	207433	321840	362098	1.12509
mir-148a-5p	Totals:	4	220	75	322.202	384.034	562.438	1.46455
mir-148b-3p	Totals:	3	229	61	262.057	399.744	457.45	1.14436
mir-148b-5p	Totals:	4	13	2	8.59204	22.6929	14.9984	0.660927
mir-149-5p	Totals:	3	3	2	8.59204	5.23683	14.9984	2.86401
mir-150-5p	Totals:	4	94	10	42.9602	164.087	74.9918	0.457024
mir-151-3p	Totals:	3	67	27	115.993	116.956	202.478	1.73123
mir-151-5p	Totals:	2	32	6	25.7761	55.8595	44.9951	0.805504
mir-152-3p	Totals:	5	274	41	176.137	478.297	307.466	0.642835
mir-152-5p	Totals:	2	7	0	0	12.2193	0	0
mir-154-5p	Totals:	1	1	0	0	1.74561	0	0
mir-155-5p	Totals:	2	4	4	17.1841	6.98244	29.9967	4.29602
mir-15a-3p	Totals:	1	1	0	0	1.74561	0	0
mir-15a-5p	Totals:	4	10	0	0	17.4561	0	0
mir-15b-3p	Totals:	1	11	0	0	19.2017	0	0
mir-15b-5p	Totals:	4	25	7	30.0722	43.6402	52.4942	1.20289
mir-16-1-3p	Totals:	3	15	1	4.29602	26.1841	7.49918	0.286401
mir-16-5p	Totals:	5	269	22	94.5125	469.569	164.982	0.351348
mir-17-3p	Totals:	1	3	2	8.59204	5.23683	14.9984	2.86401
mir-17-5p	Totals:	3	72	7	30.0722	125.684	52.4942	0.417669
mir-181a-1-3p	Totals:	2	14	0	0	24.4385	0	0
mir-181a-5p	Totals:	5	170	28	120.289	296.754	209.977	0.70758
mir-181b-5p	Totals:	4	22	4	17.1841	38.4034	29.9967	0.781095
mir-181c-3p	Totals:	1	0	0	0	0	0	#DIV/0!
mir-181c-5p	Totals:	2	1	0	0	1.74561	0	0
mir-181d-5p	Totals:	4	14	3	12.8881	24.4385	22.4975	0.920576
mir-182-5p	Totals:	4	158	12	51.5523	275.806	89.9901	0.32628
mir-183-5p	Totals:	4	55	15	64.4403	96.0085	112.488	1.17164
mir-1839-3p	Totals:	2	5	0	0	8.72804	0	0
mir-1839-5p	Totals:	6	386	45	193.321	673.805	337.463	0.500832
mir-184-3p	Totals:	3	16	0	0	27.9297	0	0
mir-1843a-3p	Totals:	3	25	4	17.1841	43.6402	29.9967	0.687364
mir-1843a-5p	Totals:	7	115	14	60.1443	200.745	104.988	0.522994
mir-1843b-5p	Totals:	5	45	7	30.0722	78.5524	52.4942	0.66827
mir-185-3p	Totals:	2	0	1	4.29602	0	7.49918	#DIV/0!
mir-185-5p	Totals:	2	253	54	231.985	441.639	404.955	0.916938
mir-186-5p	Totals:	4	50	9	38.6642	87.2804	67.4926	0.773284
mir-187-3p	Totals:	3	1	0	0	1.74561	0	0
mir-187-5p	Totals:	1	0	0	0	0	0	#DIV/0!
mir-188-5p	Totals:	1	1	0	0	1.74561	0	0
mir-18a-3p	Totals:	2	2	0	0	3.49122	0	0
mir-18a-5p	Totals:	4	7	1	4.29602	12.2193	7.49918	0.613717
mir-190a-5p	Totals:	1	0	0	0	0	0	#DIV/0!
mir-191-3p	Totals:	2	3	0	0	5.23683	0	0
mir-191-5p	Totals:	8	1050	175	751.804	1832.89	1312.36	0.716004
mir-192-3p	Totals:	2	13	0	0	22.6929	0	0
mir-192-5p	Totals:	8	26188	5011	21527.4	45714	37578.4	0.822032
mir-1932	Totals:	1	0	0	0	0	0	#DIV/0!
mir-193a-3p	Totals:	3	6	0	0	10.4737	0	0
mir-193a-5p	Totals:	2	12	3	12.8881	20.9473	22.4975	1.07401
mir-193b-3p	Totals:	1	1	0	0	1.74561	0	0
mir-194-2-3p	Totals:	2	71	15	64.4403	123.938	112.488	0.90761
mir-194-5p	Totals:	5	3132	391	1679.74	5467.25	2932.18	0.536317
mir-1940	Totals:	4	4	0	0	6.98244	0	0
mir-1943-5p	Totals:	1	1	0	0	1.74561	0	0
mir-1945	Totals:	1	1	0	0	1.74561	0	0
mir-1947-5p	Totals:	1	1	0	0	1.74561	0	0
mir-1948-3p	Totals:	1	8	1	4.29602	13.9649	7.49918	0.537003
mir-1948-5p	Totals:	1	1	1	4.29602	1.74561	7.49918	4.29602
mir-1950	Totals:	1	0	0	0	0	0	#DIV/0!
mir-1954	Totals:	1	0	0	0	0	0	#DIV/0!
mir-1958	Totals:	1	1	0	0	1.74561	0	0
mir-195a-3p	Totals:	3	4	3	12.8881	6.98244	22.4975	3.22202
mir-195a-5p	Totals:	2	12	1	4.29602	20.9473	7.49918	0.358002
mir-1960	Totals:	1	0	0	0	0	0	#DIV/0!
mir-1964-3p	Totals:	1	1	1	4.29602	1.74561	7.49918	4.29602
mir-1968-5p	Totals:	2	4	1	4.29602	6.98244	7.49918	1.07401
mir-1981-3p	Totals:	1	0	1	4.29602	0	7.49918	#DIV/0!
mir-1981-5p	Totals:	4	15	10	42.9602	26.1841	74.9918	2.86401
mir-199a-3p	Totals:	17	464	84	360.866	809.963	629.931	0.777728
mir-199a-5p	Totals:	7	83	13	55.8483	144.886	97.4893	0.672871
mir-199b-3p	Totals:	17	464	84	360.866	809.963	629.931	0.777728
mir-199b-5p	Totals:	1	6	0	0	10.4737	0	0
mir-19a-3p	Totals:	2	8	0	0	13.9649	0	0
mir-19b-3p	Totals:	3	125	9	38.6642	218.201	67.4926	0.309314
mir-1a-3p	Totals:	2	5927	133	571.371	10346.2	997.39	0.0964014
mir-200a-3p	Totals:	4	228	32	137.473	397.999	239.974	0.602951
mir-200a-5p	Totals:	3	21	2	8.59204	36.6578	14.9984	0.409145
mir-200b-3p	Totals:	3	106	15	64.4403	185.035	112.488	0.607928
mir-200b-5p	Totals:	1	1	0	0	1.74561	0	0
mir-200c-3p	Totals:	2	20	1	4.29602	34.9122	7.49918	0.214801
mir-201-5p	Totals:	2	0	0	0	0	0	#DIV/0!
mir-203-3p	Totals:	7	769	94	403.826	1342.37	704.922	0.525131
mir-203-5p	Totals:	1	1	0	0	1.74561	0	0
mir-204-5p	Totals:	1	0	0	0	0	0	#DIV/0!
mir-205-5p	Totals:	1	8	0	0	13.9649	0	0
mir-206-3p	Totals:	4	149	0	0	260.096	0	0
mir-208a-3p	Totals:	1	1	0	0	1.74561	0	0
mir-20a-3p	Totals:	1	1	0	0	1.74561	0	0
mir-20a-5p	Totals:	3	494	50	214.801	862.331	374.959	0.43482
mir-20b-5p	Totals:	1	1	0	0	1.74561	0	0
mir-210-3p	Totals:	1	1	0	0	1.74561	0	0
mir-212-5p	Totals:	1	2	0	0	3.49122	0	0
mir-214-3p	Totals:	2	6	3	12.8881	10.4737	22.4975	2.14801
mir-214-5p	Totals:	2	3	0	0	5.23683	0	0
mir-215-5p	Totals:	2	2	2	8.59204	3.49122	14.9984	4.29602
mir-216a-5p	Totals:	1	1	0	0	1.74561	0	0
mir-216b-5p	Totals:	2	2	0	0	3.49122	0	0
mir-217-5p	Totals:	2	10	0	0	17.4561	0	0
mir-218-5p	Totals:	1	10	1	4.29602	17.4561	7.49918	0.429602
mir-219a-1-3p	Totals:	1	2	1	4.29602	3.49122	7.49918	2.14801
mir-21a-3p	Totals:	1	3	0	0	5.23683	0	0
mir-21a-5p	Totals:	9	14790	2468	10602.6	25817.6	18508	0.716875
mir-22-3p	Totals:	8	14642	2744	11788.3	25559.2	20577.7	0.805101
mir-22-5p	Totals:	3	93	14	60.1443	162.342	104.988	0.646713
mir-221-3p	Totals:	4	45	11	47.2562	78.5524	82.4909	1.05014
mir-221-5p	Totals:	3	9	2	8.59204	15.7105	14.9984	0.954672
mir-222-3p	Totals:	1	4	2	8.59204	6.98244	14.9984	2.14801
mir-223-3p	Totals:	4	9	1	4.29602	15.7105	7.49918	0.477336
mir-223-5p	Totals:	1	6	2	8.59204	10.4737	14.9984	1.43201
mir-224-5p	Totals:	1	1	0	0	1.74561	0	0
mir-23a-3p	Totals:	5	322	35	150.361	562.086	262.471	0.466959
mir-23b-3p	Totals:	5	253	31	133.177	441.639	232.474	0.52639
mir-23b-5p	Totals:	1	0	0	0	0	0	#DIV/0!
mir-24-1-5p	Totals:	5	4	0	0	6.98244	0	0
mir-24-2-5p	Totals:	7	107	17	73.0324	186.78	127.486	0.682546
mir-24-3p	Totals:	8	1371	217	932.237	2393.23	1627.32	0.679969
mir-25-3p	Totals:	4	772	145	622.923	1347.61	1087.38	0.806895
mir-25-5p	Totals:	1	0	0	0	0	0	#DIV/0!
mir-26a-2-3p	Totals:	1	9	1	4.29602	15.7105	7.49918	0.477336
mir-26a-5p	Totals:	7	10440	1343	5769.56	18224.2	10071.4	0.55264
mir-26b-3p	Totals:	1	8	0	0	13.9649	0	0
mir-26b-5p	Totals:	4	676	77	330.794	1180.03	577.436	0.48934
mir-27a-3p	Totals:	4	199	38	163.249	347.376	284.969	0.820346
mir-27a-5p	Totals:	2	17	1	4.29602	29.6754	7.49918	0.252707
mir-27b-3p	Totals:	5	2693	493	2117.94	4700.92	3697.09	0.786461
mir-27b-5p	Totals:	1	1	0	0	1.74561	0	0
mir-28a-3p	Totals:	4	63	8	34.3682	109.973	59.9934	0.545527
mir-28a-5p	Totals:	3	74	14	60.1443	129.175	104.988	0.812761
mir-296-5p	Totals:	1	1	0	0	1.74561	0	0
mir-298-5p	Totals:	1	2	0	0	3.49122	0	0
mir-299a-3p	Totals:	1	1	1	4.29602	1.74561	7.49918	4.29602
mir-299a-5p	Totals:	1	3	0	0	5.23683	0	0
mir-29a-3p	Totals:	5	694	88	378.05	1211.45	659.927	0.544741
mir-29a-5p	Totals:	1	1	0	0	1.74561	0	0
mir-29b-2-5p	Totals:	1	0	0	0	0	0	#DIV/0!
mir-29b-3p	Totals:	5	24	1	4.29602	41.8946	7.49918	0.179001
mir-29c-3p	Totals:	4	29	4	17.1841	50.6227	29.9967	0.592555
mir-29c-5p	Totals:	1	6	0	0	10.4737	0	0
mir-300-3p	Totals:	2	8	0	0	13.9649	0	0
mir-301a-3p	Totals:	1	0	0	0	0	0	#DIV/0!
mir-3064-3p	Totals:	1	1	0	0	1.74561	0	0
mir-3064-5p	Totals:	1	1	0	0	1.74561	0	0
mir-3068-3p	Totals:	3	11	1	4.29602	19.2017	7.49918	0.390547
mir-3068-5p	Totals:	3	14	1	4.29602	24.4385	7.49918	0.306859
mir-3073a-3p	Totals:	1	1	0	0	1.74561	0	0
mir-3073b-3p	Totals:	1	1	0	0	1.74561	0	0
mir-3074-5p	Totals:	1	1	0	0	1.74561	0	0
mir-3084-3p	Totals:	1	1	0	0	1.74561	0	0
mir-3084-5p	Totals:	1	2	0	0	3.49122	0	0
mir-3095-3p	Totals:	1	1	0	0	1.74561	0	0
mir-30a-3p	Totals:	8	487	85	365.162	850.112	637.43	0.749819
mir-30a-5p	Totals:	9	7309	1041	4472.16	12758.7	7806.64	0.61187
mir-30b-3p	Totals:	1	10	0	0	17.4561	0	0
mir-30b-5p	Totals:	4	817	64	274.945	1426.16	479.947	0.336531
mir-30c-1-3p	Totals:	1	1	2	8.59204	1.74561	14.9984	8.59204
mir-30c-2-3p	Totals:	6	513	106	455.378	895.497	794.913	0.887677
mir-30c-5p	Totals:	6	1291	146	627.219	2253.58	1094.88	0.48584
mir-30d-3p	Totals:	2	2	0	0	3.49122	0	0
mir-30d-5p	Totals:	5	1919	320	1374.73	3349.82	2399.74	0.716377
mir-30e-3p	Totals:	4	230	47	201.913	401.49	352.461	0.877883
mir-30e-5p	Totals:	5	214	25	107.401	373.56	187.479	0.501872
mir-31-3p	Totals:	1	5	0	0	8.72804	0	0
mir-31-5p	Totals:	5	42	7	30.0722	73.3156	52.4942	0.716004
mir-3105-3p	Totals:	2	3	0	0	5.23683	0	0
mir-3105-5p	Totals:	1	1	0	0	1.74561	0	0
mir-3107-5p	Totals:	5	717	100	429.602	1251.6	749.918	0.599166
mir-32-3p	Totals:	1	1	0	0	1.74561	0	0
mir-32-5p	Totals:	3	42	5	21.4801	73.3156	37.4959	0.511431
mir-320-3p	Totals:	5	65	9	38.6642	113.465	67.4926	0.594834
mir-322-3p	Totals:	3	93	14	60.1443	162.342	104.988	0.646713
mir-322-5p	Totals:	3	4	1	4.29602	6.98244	7.49918	1.07401
mir-324-3p	Totals:	1	0	0	0	0	0	#DIV/0!
mir-324-5p	Totals:	1	3	0	0	5.23683	0	0
mir-326-3p	Totals:	2	13	1	4.29602	22.6929	7.49918	0.330463
mir-328-3p	Totals:	1	14	2	8.59204	24.4385	14.9984	0.613717
mir-329-3p	Totals:	1	0	1	4.29602	0	7.49918	#DIV/0!
mir-33-3p	Totals:	1	3	0	0	5.23683	0	0
mir-33-5p	Totals:	2	1	0	0	1.74561	0	0
mir-330-5p	Totals:	1	3	0	0	5.23683	0	0
mir-331-3p	Totals:	2	1	0	0	1.74561	0	0
mir-335-3p	Totals:	2	12	4	17.1841	20.9473	29.9967	1.43201
mir-335-5p	Totals:	2	4	2	8.59204	6.98244	14.9984	2.14801
mir-338-3p	Totals:	3	0	0	0	0	0	#DIV/0!
mir-338-5p	Totals:	3	3	0	0	5.23683	0	0
mir-339-3p	Totals:	1	0	2	8.59204	0	14.9984	#DIV/0!
mir-339-5p	Totals:	3	19	1	4.29602	33.1666	7.49918	0.226106
mir-340-3p	Totals:	3	17	9	38.6642	29.6754	67.4926	2.27436
mir-340-5p	Totals:	5	516	105	451.082	900.734	787.413	0.874191
mir-341-3p	Totals:	1	2	0	0	3.49122	0	0
mir-342-3p	Totals:	3	19	0	0	33.1666	0	0
mir-342-5p	Totals:	1	1	0	0	1.74561	0	0
mir-344-3p	Totals:	1	0	1	4.29602	0	7.49918	#DIV/0!
mir-345-3p	Totals:	1	3	1	4.29602	5.23683	7.49918	1.43201
mir-345-5p	Totals:	2	1	0	0	1.74561	0	0
mir-3470a	Totals:	1	2	6	25.7761	3.49122	44.9951	12.8881
mir-3470b	Totals:	3	2	3	12.8881	3.49122	22.4975	6.44403
mir-34a-5p	Totals:	2	3	0	0	5.23683	0	0
mir-34c-5p	Totals:	2	4	0	0	6.98244	0	0
mir-350-3p	Totals:	2	8	1	4.29602	13.9649	7.49918	0.537003
mir-351-5p	Totals:	3	15	4	17.1841	26.1841	29.9967	1.14561
mir-3535	Totals:	4	30	9	38.6642	52.3683	67.4926	1.28881
mir-361-3p	Totals:	8	125	33	141.769	218.201	247.473	1.13415
mir-361-5p	Totals:	3	27	5	21.4801	47.1314	37.4959	0.79556
mir-362-3p	Totals:	2	2	0	0	3.49122	0	0
mir-362-5p	Totals:	3	11	1	4.29602	19.2017	7.49918	0.390547
mir-365-2-5p	Totals:	1	1	1	4.29602	1.74561	7.49918	4.29602
mir-365-3p	Totals:	4	66	13	55.8483	115.21	97.4893	0.846186
mir-369-3p	Totals:	1	1	0	0	1.74561	0	0
mir-369-5p	Totals:	1	1	0	0	1.74561	0	0
mir-374b-5p	Totals:	5	93	14	60.1443	162.342	104.988	0.646713
mir-374c-5p	Totals:	1	0	0	0	0	0	#DIV/0!
mir-375-3p	Totals:	1	178	0	0	310.718	0	0
mir-376c-3p	Totals:	1	1	0	0	1.74561	0	0
mir-378a-3p	Totals:	11	2849	395	1696.93	4973.24	2962.17	0.595623
mir-378a-5p	Totals:	4	47	10	42.9602	82.0436	74.9918	0.914047
mir-378b	Totals:	2	6	0	0	10.4737	0	0
mir-378c	Totals:	10	637	101	433.898	1111.95	757.417	0.681159
mir-378d	Totals:	2	2	0	0	3.49122	0	0
mir-379-3p	Totals:	1	1	0	0	1.74561	0	0
mir-379-5p	Totals:	2	145	32	137.473	253.113	239.974	0.948088
mir-380-5p	Totals:	1	1	0	0	1.74561	0	0
mir-381-3p	Totals:	1	26	2	8.59204	45.3858	14.9984	0.330463
mir-382-5p	Totals:	2	4	0	0	6.98244	0	0
mir-409-3p	Totals:	1	0	1	4.29602	0	7.49918	#DIV/0!
mir-409-5p	Totals:	1	0	1	4.29602	0	7.49918	#DIV/0!
mir-411-3p	Totals:	1	0	1	4.29602	0	7.49918	#DIV/0!
mir-411-5p	Totals:	2	17	2	8.59204	29.6754	14.9984	0.505414
mir-412-5p	Totals:	1	1	0	0	1.74561	0	0
mir-421-3p	Totals:	1	2	0	0	3.49122	0	0
mir-423-3p	Totals:	5	86	41	176.137	150.122	307.466	2.0481
mir-423-5p	Totals:	4	120	29	124.585	209.473	217.476	1.03821
mir-425-3p	Totals:	1	1	0	0	1.74561	0	0
mir-425-5p	Totals:	4	46	10	42.9602	80.298	74.9918	0.933918
mir-429-3p	Totals:	3	57	11	47.2562	99.4997	82.4909	0.829057
mir-431-5p	Totals:	1	0	0	0	0	0	#DIV/0!
mir-434-3p	Totals:	4	9	0	0	15.7105	0	0
mir-434-5p	Totals:	2	37	2	8.59204	64.5875	14.9984	0.232217
mir-450a-1-3p	Totals:	1	0	0	0	0	0	#DIV/0!
mir-450a-5p	Totals:	3	18	6	25.7761	31.421	44.9951	1.43201
mir-450b-5p	Totals:	1	2	0	0	3.49122	0	0
mir-451a	Totals:	8	1070	154	661.587	1867.8	1154.87	0.618306
mir-452-3p	Totals:	1	1	0	0	1.74561	0	0
mir-455-3p	Totals:	1	1	0	0	1.74561	0	0
mir-455-5p	Totals:	3	40	4	17.1841	69.8244	29.9967	0.429602
mir-466a-3p	Totals:	1	1	0	0	1.74561	0	0
mir-466b-3p	Totals:	1	1	0	0	1.74561	0	0
mir-466c-3p	Totals:	1	1	0	0	1.74561	0	0
mir-466c-5p	Totals:	1	0	0	0	0	0	#DIV/0!
mir-466e-3p	Totals:	1	1	0	0	1.74561	0	0
mir-466p-3p	Totals:	1	1	0	0	1.74561	0	0
mir-467a-3p	Totals:	1	2	0	0	3.49122	0	0
mir-467a-5p	Totals:	3	3	0	0	5.23683	0	0
mir-467b-5p	Totals:	1	0	0	0	0	0	#DIV/0!
mir-467d-3p	Totals:	1	2	0	0	3.49122	0	0
mir-467d-5p	Totals:	1	0	0	0	0	0	#DIV/0!
mir-467e-5p	Totals:	1	1	0	0	1.74561	0	0
mir-470-5p	Totals:	1	0	1	4.29602	0	7.49918	#DIV/0!
mir-484	Totals:	2	30	4	17.1841	52.3683	29.9967	0.572803
mir-485-5p	Totals:	1	1	0	0	1.74561	0	0
mir-486-3p	Totals:	1	2	0	0	3.49122	0	0
mir-486-5p	Totals:	5	717	100	429.602	1251.6	749.918	0.599166
mir-491-3p	Totals:	1	1	0	0	1.74561	0	0
mir-491-5p	Totals:	1	1	0	0	1.74561	0	0
mir-495-3p	Totals:	2	2	0	0	3.49122	0	0
mir-497b	Totals:	1	0	0	0	0	0	#DIV/0!
mir-499-5p	Totals:	1	1	0	0	1.74561	0	0
mir-500-3p	Totals:	2	4	0	0	6.98244	0	0
mir-501-3p	Totals:	2	9	0	0	15.7105	0	0
mir-501-5p	Totals:	2	2	0	0	3.49122	0	0
mir-503-3p	Totals:	1	0	0	0	0	0	#DIV/0!
mir-505-3p	Totals:	1	0	0	0	0	0	#DIV/0!
mir-5099	Totals:	2	10	0	0	17.4561	0	0
mir-511-3p	Totals:	3	1	3	12.8881	1.74561	22.4975	12.8881
mir-5114	Totals:	1	1	0	0	1.74561	0	0
mir-5121	Totals:	2	2	0	0	3.49122	0	0
mir-5123	Totals:	1	1	0	0	1.74561	0	0
mir-5129-3p	Totals:	1	1	0	0	1.74561	0	0
mir-532-3p	Totals:	2	10	1	4.29602	17.4561	7.49918	0.429602
mir-532-5p	Totals:	3	524	129	554.187	914.699	967.394	1.05761
mir-541-5p	Totals:	4	31	5	21.4801	54.1139	37.4959	0.692907
mir-542-3p	Totals:	3	29	9	38.6642	50.6227	67.4926	1.33325
mir-547-3p	Totals:	1	0	0	0	0	0	#DIV/0!
mir-551b-3p	Totals:	1	1	0	0	1.74561	0	0
mir-5615-5p	Totals:	3	4	0	0	6.98244	0	0
mir-5620-5p	Totals:	1	1	0	0	1.74561	0	0
mir-574-3p	Totals:	2	9	0	0	15.7105	0	0
mir-574-5p	Totals:	3	3	1	4.29602	5.23683	7.49918	1.43201
mir-582-3p	Totals:	2	2	0	0	3.49122	0	0
mir-598-3p	Totals:	3	4	0	0	6.98244	0	0
mir-6240	Totals:	2	0	0	0	0	0	#DIV/0!
mir-6516-5p	Totals:	1	0	0	0	0	0	#DIV/0!
mir-652-3p	Totals:	3	39	10	42.9602	68.0787	74.9918	1.10154
mir-6538	Totals:	1	0	1	4.29602	0	7.49918	#DIV/0!
mir-6539	Totals:	1	0	0	0	0	0	#DIV/0!
mir-664-3p	Totals:	1	0	0	0	0	0	#DIV/0!
mir-664-5p	Totals:	2	3	0	0	5.23683	0	0
mir-669a-5p	Totals:	1	1	1	4.29602	1.74561	7.49918	4.29602
mir-669c-5p	Totals:	2	3	0	0	5.23683	0	0
mir-669k-5p	Totals:	1	0	0	0	0	0	#DIV/0!
mir-669l-5p	Totals:	1	0	1	4.29602	0	7.49918	#DIV/0!
mir-669o-5p	Totals:	1	1	0	0	1.74561	0	0
mir-669p-5p	Totals:	1	1	1	4.29602	1.74561	7.49918	4.29602
mir-671-3p	Totals:	1	1	1	4.29602	1.74561	7.49918	4.29602
mir-671-5p	Totals:	1	0	1	4.29602	0	7.49918	#DIV/0!
mir-674-3p	Totals:	7	40	12	51.5523	69.8244	89.9901	1.28881
mir-674-5p	Totals:	1	1	1	4.29602	1.74561	7.49918	4.29602
mir-676-3p	Totals:	1	8	1	4.29602	13.9649	7.49918	0.537003
mir-676-5p	Totals:	1	21	2	8.59204	36.6578	14.9984	0.409145
mir-677-3p	Totals:	1	0	1	4.29602	0	7.49918	#DIV/0!
mir-6899-3p	Totals:	1	1	0	0	1.74561	0	0
mir-690	Totals:	3	10	12	51.5523	17.4561	89.9901	5.15523
mir-6939-3p	Totals:	1	0	0	0	0	0	#DIV/0!
mir-6969-3p	Totals:	2	2	0	0	3.49122	0	0
mir-6972-3p	Totals:	1	0	0	0	0	0	#DIV/0!
mir-6978-3p	Totals:	2	1	0	0	1.74561	0	0
mir-6989-3p	Totals:	1	0	0	0	0	0	#DIV/0!
mir-700-3p	Totals:	1	1	0	0	1.74561	0	0
mir-700-5p	Totals:	1	1	0	0	1.74561	0	0
mir-701-5p	Totals:	1	1	0	0	1.74561	0	0
mir-7015-3p	Totals:	1	0	1	4.29602	0	7.49918	#DIV/0!
mir-704	Totals:	1	0	0	0	0	0	#DIV/0!
mir-7043-3p	Totals:	1	3	0	0	5.23683	0	0
mir-708-3p	Totals:	1	6	1	4.29602	10.4737	7.49918	0.716004
mir-7118-3p	Totals:	1	0	0	0	0	0	#DIV/0!
mir-712-5p	Totals:	1	1	0	0	1.74561	0	0
mir-7219-3p	Totals:	2	2	0	0	3.49122	0	0
mir-7225-5p	Totals:	1	0	1	4.29602	0	7.49918	#DIV/0!
mir-741-3p	Totals:	1	2	0	0	3.49122	0	0
mir-743a-3p	Totals:	1	0	0	0	0	0	#DIV/0!
mir-744-3p	Totals:	1	1	0	0	1.74561	0	0
mir-744-5p	Totals:	4	28	14	60.1443	48.877	104.988	2.14801
mir-7669-3p	Totals:	1	1	0	0	1.74561	0	0
mir-7669-5p	Totals:	1	0	0	0	0	0	#DIV/0!
mir-7a-1-3p	Totals:	4	7	0	0	12.2193	0	0
mir-7a-5p	Totals:	5	951	170	730.324	1660.07	1274.86	0.767954
mir-7b-5p	Totals:	3	4	0	0	6.98244	0	0
mir-802-3p	Totals:	3	6	0	0	10.4737	0	0
mir-802-5p	Totals:	5	41	6	25.7761	71.57	44.9951	0.628686
mir-8103	Totals:	1	0	0	0	0	0	#DIV/0!
mir-8114	Totals:	1	1	0	0	1.74561	0	0
mir-872-3p	Totals:	2	5	0	0	8.72804	0	0
mir-872-5p	Totals:	4	65	7	30.0722	113.465	52.4942	0.462649
mir-874-3p	Totals:	2	0	0	0	0	0	#DIV/0!
mir-881-3p	Totals:	1	2	1	4.29602	3.49122	7.49918	2.14801
mir-9-5p	Totals:	1	5	0	0	8.72804	0	0
mir-92a-3p	Totals:	4	43	4	17.1841	75.0612	29.9967	0.39963
mir-92b-3p	Totals:	2	1	0	0	1.74561	0	0
mir-93-3p	Totals:	1	2	0	0	3.49122	0	0
mir-93-5p	Totals:	4	168	19	81.6244	293.262	142.484	0.48586
mir-96-5p	Totals:	1	7	1	4.29602	12.2193	7.49918	0.613717
mir-98-5p	Totals:	3	314	21	90.2165	548.121	157.483	0.287314
mir-99a-5p	Totals:	5	1443	415	1782.85	2518.91	3112.16	1.23552
mir-99b-3p	Totals:	1	9	2	8.59204	15.7105	14.9984	0.954672
mir-99b-5p	Totals:	4	475	109	468.266	829.164	817.41	0.985824
			572866	133348	572866	1e+06	1e+06
Normalization factor			1	4.29602
