# Supplementary material for: MicroRNA profiling of mouse liver in response to DENV-1 infection by deep sequencing
Source: PeerJ. 2019 Apr 22;7:e6697. doi: 10.7717/peerj.6697 (PMC6482938; doi:10.7717/peerj.6697)
Supplement: Data S2 [file peerj-07-6697-s002.xlsx]

## Sheet: Non-detected miRNAs in both
The List of Non-detected miRNAs in Both Libraries
miRNA Code	Raw Expression		Normalized Read Count	Normalized Expression
	Uninfected control	DENV-1	DENV-1	Uninfected control	DENV-1
mir-1198-3p	0	0	0	0	0
mir-127-5p	0	0	0	0	0
mir-129-5p	0	0	0	0	0
mir-130b-5p	0	0	0	0	0
mir-145b	0	0	0	0	0
mir-181c-3p	0	0	0	0	0
mir-187-5p	0	0	0	0	0
mir-190a-5p	0	0	0	0	0
mir-1932	0	0	0	0	0
mir-1950	0	0	0	0	0
mir-1954	0	0	0	0	0
mir-1960	0	0	0	0	0
mir-201-5p	0	0	0	0	0
mir-204-5p	0	0	0	0	0
mir-23b-5p	0	0	0	0	0
mir-25-5p	0	0	0	0	0
mir-29b-2-5p	0	0	0	0	0
mir-301a-3p	0	0	0	0	0
mir-324-3p	0	0	0	0	0
mir-338-3p	0	0	0	0	0
mir-374c-5p	0	0	0	0	0
mir-431-5p	0	0	0	0	0
mir-450a-1-3p	0	0	0	0	0
mir-466c-5p	0	0	0	0	0
mir-467b-5p	0	0	0	0	0
mir-467d-5p	0	0	0	0	0
mir-497b	0	0	0	0	0
mir-503-3p	0	0	0	0	0
mir-505-3p	0	0	0	0	0
mir-547-3p	0	0	0	0	0
mir-6240	0	0	0	0	0
mir-6516-5p	0	0	0	0	0
mir-6539	0	0	0	0	0
mir-664-3p	0	0	0	0	0
mir-669k-5p	0	0	0	0	0
mir-6939-3p	0	0	0	0	0
mir-6972-3p	0	0	0	0	0
mir-6989-3p	0	0	0	0	0
mir-704	0	0	0	0	0
mir-7118-3p	0	0	0	0	0
mir-743a-3p	0	0	0	0	0
mir-7669-5p	0	0	0	0	0
mir-8103	0	0	0	0	0
mir-874-3p	0	0	0	0	0
