# Supplementary material for: MicroRNA profiling of mouse liver in response to DENV-1 infection by deep sequencing
Source: PeerJ. 2019 Apr 22;7:e6697. doi: 10.7717/peerj.6697 (PMC6482938; doi:10.7717/peerj.6697)
Supplement: Data S4 [file peerj-07-6697-s004.xlsx]

## Sheet: Non-detected miRNAs in either
The List of Non-detected miRNAs in Either One of Two Libraries (TPM > 10)
miRNA Code	Raw Expression		Normalized Read Count	Normalized Expression (TPM > 10)
	Uninfected control	DENV-1	DENV-1	Uninfected control	DENV-1
mir-339-3p	0	2	8.59204	0	14.9984
let-7d-3p	7	0	0	12.2193	0
mir-133a-3p	42	0	0	73.3156	0
mir-133b-3p	7	0	0	12.2193	0
mir-152-5p	7	0	0	12.2193	0
mir-15a-5p	10	0	0	17.4561	0
mir-15b-3p	11	0	0	19.2017	0
mir-181a-1-3p	14	0	0	24.4385	0
mir-184-3p	16	0	0	27.9297	0
mir-192-3p	13	0	0	22.6929	0
mir-193a-3p	6	0	0	10.4737	0
mir-199b-5p	6	0	0	10.4737	0
mir-19a-3p	8	0	0	13.9649	0
mir-205-5p	8	0	0	13.9649	0
mir-206-3p	149	0	0	260.096	0
mir-217-5p	10	0	0	17.4561	0
mir-26b-3p	8	0	0	13.9649	0
mir-29c-5p	6	0	0	10.4737	0
mir-300-3p	8	0	0	13.9649	0
mir-30b-3p	10	0	0	17.4561	0
mir-342-3p	19	0	0	33.1666	0
mir-375-3p	178	0	0	310.718	0
mir-378b	6	0	0	10.4737	0
mir-434-3p	9	0	0	15.7105	0
mir-501-3p	9	0	0	15.7105	0
mir-5099	10	0	0	17.4561	0
mir-574-3p	9	0	0	15.7105	0
mir-7a-1-3p	7	0	0	12.2193	0
mir-802-3p	6	0	0	10.4737	0
